1 **The potential of dynamic physiological traits in young tomato plants to predict field-**  
2 **yield performance**

3

4 Sanbon Chaka Gosa<sup>1\*</sup>, Amit Koch<sup>1\*</sup>, Itamar Shenhar<sup>1</sup>, Joseph Hirschberg<sup>2</sup>, Dani Zamir<sup>1</sup>,  
5 Menachem Moshelion<sup>1#</sup>

6 <sup>1</sup> The R.H. Smith Institute of Plant Sciences and Genetics in Agriculture, The R.H. Smith  
7 Faculty of Agriculture, Food and Environment, The Hebrew University of Jerusalem,  
8 Rehovot, 76100 Israel

9 <sup>2</sup> Department of Genetics, Alexander Silberman Institute of Life Sciences, The Hebrew  
10 University of Jerusalem, Jerusalem 9190401, Israel

11 \* Equal contribution

12 #Correspondence: [menachem.moshelion@mail.huji.ac.il](mailto:menachem.moshelion@mail.huji.ac.il)

13

14

15

16

17

18

19

20

21

22

23

24

25

26     **Abstract**

27     To address the challenge of predicting tomato yields in the field, we used whole-plant  
28     functional phenotyping to evaluate water relations under well-irrigated and drought  
29     conditions. The genotypes tested are known to exhibit variability in their yields in wet and  
30     dry fields. The examined lines included two lines with recessive mutations that affect  
31     carotenoid biosynthesis, zeta  $z^{2083}$  and tangerine  $t^{3406}$ , both isogenic to the processing  
32     tomato variety M82. The two mutant lines were reciprocally grafted onto M82, and multiple  
33     physiological characteristics were measured continuously, before, during and after drought  
34     treatment in the greenhouse. A comparative analysis of greenhouse and field yields showed  
35     that the whole-canopy stomatal conductance ( $g_{sc}$ ) in the morning and cumulative  
36     transpiration (CT) were strongly correlated with field measurements of total yield (TY:  $r^2$   
37     = 0.9 and 0.77, respectively) and plant vegetative weight (PW:  $r^2$  = 0.6 and 0.94,  
38     respectively). Furthermore, the minimum CT during drought and the rate of recovery when  
39     irrigation was resumed were both found to predict resilience.

40     **Keywords:** drought tolerance, functional phenotyping, physiological trait, time-series  
41     measurements, tomato, yield prediction.

42

43

44

45

46

47

48

49

## 50        **1. Introduction**

51        Water stress is the main factor limiting crop yields worldwide [1–3]. Despite intense research  
52        over the last decades, drought tolerance is still a major threat to plant growth and crop  
53        productivity [4]. The water balance-regulation mechanisms in plants are critical for stress  
54        responses, productivity, and resilience, as reviewed in [6]. This balance is controlled by  
55        combining two regulation mechanisms: leaf hydraulic conductance [7,8] and the  
56        transpiration [9,10]. Continuous measurement of the first one is still a challenge, but high-  
57        throughput functional physiological phenotyping (FPP) analysis can be used for the second  
58        one[6], which should be considered when selecting traits for crop improvement and  
59        predicting crop performance under certain environmental conditions. Accurate yield  
60        prediction is important for national food security and global food production [11] and it also  
61        aids policymaking. From the research and development perspective, yield prediction tools  
62        would enable breeders to reduce the time and cost required to select the best parent lines and  
63        test new hybrids under different environmental conditions[12,13]. Finally, reliable yield  
64        prediction would benefit the growers who are the end-users of newly developed, improved  
65        varieties, aiding their crop management and helping them to make wise economic decisions  
66        [14]. However, early growth-stage prediction of crop yields is a challenging task, in general,  
67        and is even more challenging under water stress. Several yield-prediction models have been  
68        developed, some of which consider yield as a function of genotype (G) and environment (E)  
69        and treat the interaction between the two (G×E) as a noise [15,16]. Some other models  
70        address G×E interactions using multiplicative models [17], factor analytic (FA) models and  
71        linear mixed models to cluster environments and genotypes and detect their interactions [18–  
72        20]. A recently developed yield-prediction model, which is based on a deep neural network  
73        fed with weather and soil-condition data for 2,247 sites and yield data for 2,267 maize  
74        hybrids) was found to accurately predict yields[13]. The developers of that system concluded

75 that environmental factors had a stronger effect on the crop yield than genotype did. Thus,  
76 early-season yield prediction may require a large amount of data from the soil-plant-  
77 atmosphere continuum (SPAC). Plant physiological traits that are most relevant to  
78 productivity and are very responsive to environmental conditions are expected to serve as  
79 important yield predictors [6].

80 Recent advances in crop physiology show that under drought conditions, quantitative  
81 physiological traits such as stomatal conductance [21], osmotic adjustment, accumulation  
82 and remobilization of stem reserves and photosynthetic efficiency are strongly correlated  
83 with yield [22–24]. Nevertheless, most of the available models do not include key plant  
84 physiological traits, such as  $g_{sc}$  and photosynthesis, which contribute to crop productivity  
85 [25,26]. These traits are among the primary and most sensitive responses of the plant to the  
86 changing environment [27] and this dynamic behavior helps to optimize the plant's response  
87 to changing environmental conditions and probably also helps to maximize yield. For  
88 example, the early morning peak in stomatal conductance is proposed as a 'golden hour' with  
89 the assumption of high CO<sub>2</sub> absorption while transpiration is low due to the relatively low  
90 VPD [6].

91 Therefore, we hypothesized that having a set of high-resolution and continuous data  
92 for many key-physiological traits, measured under different environmental conditions at an  
93 early growth stage, could improve our ability to predict the yields of particular genotypes  
94 under field conditions. To profile physiological traits that reliably contribute to the yield-  
95 prediction model, we used two carotenoid biosynthesis mutants, which affect abscisic acid  
96 in roots and revealed yield reduction compared with the isogenic control genotype M82 (see  
97 Materials and Methods).

## 98 2. Materials and Methods

### 99 2.1 Plant material and the grafting procedure

100 Tomato cv. M82 seeds [28], the recessive mutant *zeta*  $z^{2083}$  (ZET) described in [29] and the  
101 *tangerine*  $t^{3406}$  (TAN) mutant described in [30,31] were used. Mutants selected as they  
102 displayed stable yield reductions when compared to the M82. Moreover, the xanthophylls

103 violaxanthin and neoxanthin are the precursors for the synthesis of xanthoxin, which is  
104 converted to ABA. ABA synthesis in roots has been shown to affect plant growth in various  
105 ways. Consequently, the ABA synthesis in roots is compromised. Therefore, as a way of  
106 increasing yield variation and evaluation for the relative contribution of root ABA to the  
107 phenotypes we measure, we made seven grafting combinations, four hetero grafting in which  
108 M82 was reciprocally grafted with ZET and TAN, and three self-grafts for each genotype.  
109 These mutant lines have mutations that affect two of the four enzymes reported to convert  
110 phytoene into phytoene desaturase (PDS),  $\zeta$ -carotene desaturase (ZDS), zeta isomerase  
111 (ZISO) and carotene isomerase (CRTISO; [32,33].

## 112 **2.2 Open-field experiments**

113 The results presented here are from work that was done in two consecutive growing seasons,  
114 2018 and 2019, at the Western Galilee Experimental Station in Akko, Israel. In those trials,  
115 we used a low planting density of one plant per m<sup>2</sup>. In 2018, the experiment involved  
116 individual plants in a completely randomized design in blocks, with a minimum of 15  
117 replicates per block. In 2019, the experiment was conducted in plots of 10 plants per 5 m<sup>2</sup>,  
118 arranged in a randomized block design. The seedlings were grown at a commercial nursery  
119 (Hishtil, Ashkelon, Israel) for 35 days and then transplanted into the field at the beginning of  
120 April; wet and dry trials were conducted. Both wet and dry fields started the growing season  
121 at field capacity, which represents the maximum amount of water that the soil could hold. In  
122 the wet treatment, 320 m<sup>3</sup> of water was applied per 1000 m<sup>2</sup> of field throughout the growing  
123 season, according to the irrigation protocols commonly used in the area. In the limited-  
124 irrigation (drought) treatment, we stopped irrigation 3 weeks after planting, so only 30 m<sup>3</sup> of  
125 water was applied per 1000 m<sup>2</sup> of field. There was no rain during the experimental period,  
126 so the drought scenario was managed entirely via irrigation.

## 127 **2.3 Measurements of yield and yield components**

128 The experiments were harvested when nearly 100% ripened. Plant vegetative weight (PW, g  
129  $m^{-2}$ ) was determined by weighing only the vegetative tissue (after harvesting the fruits)  
130 without the roots. Total fruit yield (TY,  $g\ m^{-2}$ ) per plant or plot included both the red and a  
131 few green fruits. Mean of 20 red fruits (FW) was estimated from a random sample of 20 fruits  
132 per plant or plot. The concentration of total soluble solids (Brix %) was measured using a  
133 digital refractometer and a random sample of 10 fruits per plant or 20 fruits per plot. The  
134 sugar output per plant or plot was calculated as the product of Brix and TY.

#### 135 **2.4 Pigment extraction and analysis**

136 Fresh samples of root and flower tissues (50 to 100 mg) were harvested and immediately  
137 frozen in liquid nitrogen. Carotenoids were extracted and quantified according to protocols  
138 described by [34].

#### 139 **2.5 Greenhouse experiment using the physiological-phenotyping platform**

140 A greenhouse experiment was conducted in parallel with a field experiment from mid-April  
141 to mid-May in 2018. The grafted and well-established seedlings were transplanted into 4-L  
142 pots filled with potting soil (Bental 11, Tuff Marom Golan, Israel). Plants were grown under  
143 semi-controlled greenhouse conditions with naturally fluctuating light (see Fig. 1A). Whole-  
144 plant, continuous physiological measurements were taken using a high-throughput,  
145 telemetric, gravimetric-based phenotyping system (Plantarry 3.0 system; Plant-DiTech,  
146 Israel) in the greenhouse of the I-CORE Center for Functional Phenotyping  
147 (<http://departments.agri.huji.ac.il/plantscience/icore.phpon>), as described in [35].

148 The set-up included 72 highly sensitive, temperature-compensated load cells, which  
149 were used as weighing lysimeters. Each unit was connected to its own controller, which  
150 collected data and controlled the irrigation to each plant separately. A pot containing a single  
151 plant was placed on each load cell. (For more details, see the “Experimental set-up” section.)

152 The data were analyzed using SPAC-analytics (Plant-Ditech), a web-based software program  
153 that allowed us to view and analyze the real-time data collected from the Plantarray system.

## 154 **2.6 Experimental set-up**

155 The experimental set-up was generally similar to that described by [35], with some  
156 modifications. Briefly, before the start of the experiment, all load-cell units were calibrated  
157 for accuracy and drift level under constant load weights (1 kg and 5 kg). Each pot was placed  
158 into a Plantarray plastic drainage container on a lysimeter. The containers fit the pot size, to  
159 enable the accurate return to pot capacity after irrigation and to prevent evaporation. The  
160 container had orifices on its side walls that were located at different heights, to allow for  
161 different water levels after the drainage of excess water following irrigation. Evaporation  
162 from the soil surface was prevented by a cover with a circle cut out at its center through  
163 which the plant grew.

164 Each pot was irrigated with a multi-outlet dripper assembly that was pushed into the  
165 soil to ensure that the medium in the pot was uniformly wetted at the end of the free-drainage  
166 period following each irrigation event. Irrigation events were programmed to take place  
167 during the night in three consecutive pulses (see inset in Fig.1B). The amount of water left  
168 in the drainage containers underneath the pots at the end of the irrigation events was intended  
169 to provide water to the well-irrigated plants beyond the water volume at pot capacity. The  
170 associated monotonic weight loss over the course of the daytime hours was essential for the  
171 calculation of the different physiological traits using the data-analysis algorithms (see inset  
172 in Fig. 1B).

173 **Drought treatment:** As each individual plant has a unique transpiration rate based on its  
174 genetic characteristics and location in the greenhouse, stopping the irrigation of all plants at  
175 once would lead to non-homogeneous drought conditions. To enable a standard drought  
176 treatment (i.e., similar drying rate for all pots), drought scenarios were automatically

177 controlled via the system's feedback-irrigation controller, in which each plant was subjected  
178 to a constant reduction in soil water content based on its daily water loss

## 179 **2.7 Measurement of quantitative physiological traits**

180 The following water-relations kinetics and quantitative physiological traits of the plants were  
181 determined simultaneously, following protocols and equations [1] implemented in the SPAC-  
182 analytics software for daily transpiration, transpiration rate, normalized transpiration (E) and  
183 WUE. Cumulative transpiration (CT) was calculated as the sum of daily transpiration for all  
184 29 days of the experiment for each plant. The other physiological traits used in this  
185 experiment are described in [36]. The estimated plant weight at the beginning of the  
186 experiment was calculated as the difference between the total system weight and the sum of  
187 the tare weight of the pot + the drainage container, the weight of the soil at pot capacity and  
188 the weight of the water in the drainage container at the end of the free drainage. The plant  
189 weight at the end of a growth period (calculated plant weight) was calculated as the sum of  
190 the initial plant weight and the product of the multiplication of the cumulative transpiration  
191 during the period by the WUE. The latter, determined as the ratio between the daily weight  
192 gain and the transpiration during that day, was calculated automatically each day by the  
193 SPAC-analytics software. The plant's recovery from drought was described by the rate at  
194 which the plant gained weight following the resumption of irrigation (recovery stage).

## 195 **2.8 Data presentation and statistical analysis**

196 We used the JMP® ver. 14 statistical packages (SAS Institute, Cary, NC, USA) for our  
197 statistical analyses. Levene's test was used to examine the homogeneity of variance among  
198 the treatments. Differences between the genotypes were examined using Tukey HSD. Each  
199 analysis involved a set significance level of  $P \leq 0.05$ .



200 Pairwise Pearson correlations between traits under greenhouse conditions and the yield and  
201 yield components measured in the open field (i.e., plant vegetative weight, red yield, green  
202 yield, Brix yield and total yield) were calculated using the genotype's mean performance.

### 203 **3. Results**

#### 204 **3.1 Field-based plant weight and total yield**

205 The yield components plant vegetative weight (PW), total yield (TY), and green yield (GY)  
206 were tested under well-irrigated and dry conditions in the 2018 and 2019 growing seasons.  
207 Comparing two key traits TY and PW we found similar performances of the genotypes across  
208 years in 2018 and 2019.

209 **Plant vegetative weight (PW):** In the well-irrigated field, the M82 self-grafted plants  
210 (M82\_scion/M82\_rootstock) had a significantly higher PW than the TAN/TAN and  
211 ZET/ZET plants. Under the dry condition, no significant difference was observed between  
212 the M82 and TAN self-grafted plants, whereas the plant vegetative weights of the ZET/ZET  
213 plants were significantly lower (Fig. 2A, B) under both well-irrigated and dry conditions.

214 **Total Yield (TY):** Under well-irrigated conditions, the TY of the different self-grafted M82  
215 was significantly different from both mutants across both years. The total yield of M82/M82  
216 was significantly higher than the yields of the other self-grafted plants, TAN/TAN was a  
217 medium yielder and ZET/ZET had the lowest yield of all the self-grafted plants across both  
218 years. Under the drought condition, the total yield of M82/M82 remained higher than those  
219 of the other two genotypes, which were not different from each other (Fig. 2C and D,  
220 respectively). However, the TY under the drought condition was less than half of that  
221 observed under the well-irrigated condition. To increase the phenotypic variation in yield,  
222 we used a reciprocal-grafting approach, in which seven combinations of the three tomato  
223 cultivars resulted in different gradients of yield performance under wet and dry conditions

224 (Fig. 2C and D, respectively). TY increased more than 2-fold when TAN and ZET scions  
225 were grafted onto M82 rootstock, especially under dry conditions.

### 226 **3.2 Early-stage physiological traits measured in the greenhouse.**

227 To identify physiological traits of young tomato plants that might serve as good predictors  
228 of yield in the field, we profiled multiple physiological traits using continuous data collected  
229 on a minute time-scale, such as whole-canopy stomatal conductance ( $g_{sc}$ ); continuous data  
230 collected on a daily time-scale, such as transpiration throughout the experimental period as a  
231 cumulative transpiration (CT); and single-point measurements such as growth rate and plant  
232 net weight (see Table 1).

233 The continuous measurement data show that the traits varied with the environment.  
234 For example, as shown in Figure 3, the whole-canopy conductance measured every 3 min for  
235 the whole day fluctuated over the course of the day in response to the environment. To better  
236 understand this trait, we divided the day into three periods: morning, midday, and late  
237 afternoon time period. We found that stomatal conductance was relatively high at morning  
238 time (Fig. 3, marked in green), declined between midday and late afternoon to some point,  
239 and then increased again during the late afternoon. We also performed a correlation analysis  
240 using the average value of morning (7:00am -10:00am), (midday, 10:00am-13:00pm) and  
241 late afternoon (13:00pm-17:00pm) measurement and correlated it with field-based yield and  
242 biomass data.

### 243 **3.3 Correlation of greenhouse physiological traits with yield and yield components in** 244 **the field**

245 Data from the functional-phenotyping system were composed of continuous soil-plant-  
246 atmosphere measurements, with each data point representing the trait at a certain time point.  
247 In contrast, field data are normally composed of a single-point measurement that represents

248 the plant's absolute performance throughout the season (e.g., total fruit yield or plant  
249 vegetative weight). When we compared time-series, cumulative and single-point  
250 physiological traits (measured traits) of young tomato plants with their field-based yield-  
251 related traits (TY, PW, RF, GF and Brix.), we found only a few traits that were highly  
252 correlated with each other (Table 1), out of about 95 bivariate combinations (see Fig. 4,  
253 Supplementary Figs. S3 and S4). Here, we present a few physiological traits for which the  
254 greenhouse data was strongly correlated with the field data and for which we observed low  
255  $p$ -values (e.g., the highly correlated traits in Table 1).

256 Time-series data are highly dynamic because of the plant's continuous response to  
257 environmental changes (e.g., stomatal conductance, Fig.3; transpiration rate). Therefore,  
258 some data points were strongly correlated with yield (e.g.,  $g_{sc}$  in the morning, Table 1) while  
259 others were weakly correlated with yield (e.g.,  $g_{sc}$  at midday; Table 1). Looking at cumulative  
260 physiological data or single-point traits, both presented as a single value (e.g., CT, growth  
261 rate, plant net weight), eliminated the need to select a specific time point and revealed highly  
262 significant and positive correlations between CT and yield and most of the yield components  
263 under well-irrigated conditions (Fig. 4A–D). Similarly, the CT of drought-treated plants after  
264 recovery in the greenhouse was positively correlated with yield and with most yield  
265 components, but poorly correlated with green yield (Fig. 4C). A similar positive correlation  
266 between CT and yield in the field was observed in 2019 (Supplementary Figs. S5 and S6).

### 267 **3.4 Cumulative transpiration as an indicator of resilience and yield performance**

268 The rate of plants' recovery from drought stress (i.e., drought resilience) is an important trait.  
269 To evaluate this resilience, we measured the CT for the first week after recovery from  
270 drought. We then compared that CT data with CT data from two other periods during the  
271 experiment: the pre-drought period and the drought period (Fig. 5A). While the CT over the  
272 pre-drought treatment showed a similar positive correlation with that of the entire well-

273 irrigated experiment (Fig. 5B), we found a strong negative correlation between total yield  
274 and CT and under drought conditions (Fig. 5C). We also observed a strong positive  
275 correlation between CT and TY during the recovery period (Fig. 5D), even though the actual  
276 total yield of the drought-treated plants was half that of the plants grown under the well-  
277 irrigated condition.

#### 278 **4. Discussion**

279 Physiological traits (e.g., photosynthesis or stomatal conductance) are key contributors to  
280 plant productivity and yield [37,38]. However, existing methods of measuring these traits are  
281 mostly manual and thus are limited to a single point on a single leaf at a time [39]. As these  
282 physiological traits are very sensitive to ambient conditions, especially light and vapor  
283 pressure deficit (VPD); [6], conventional manual measurements fail to capture the temporal  
284 and spatial dynamic interactions between the genotype and the environment. This could be  
285 misleading for yield prediction, as plants respond differently to dynamic growing conditions  
286 [6]. Hence, the integration of manual physiological measurements into breeding programs is  
287 limited, most likely due to their low-throughput nature and the large degree of variation  
288 within and between temporal and spatial measurements.

289 In this study, we used continuous measurements of physiological traits to assess  
290 whether those traits could serve as early predictors of plant responses to environmental  
291 conditions. We used a high-throughput, physiological phenotyping platform, with a high  
292 resolution of 3-min intervals, to capture plant responses to the environment. In our  
293 experiments, we captured a detailed profile of each plant's performance. Yet, another  
294 challenge was to leverage the daily dynamic responses of plants from these detailed profiles  
295 in order to understand their importance in the actual field condition (e.g., choosing the  
296 measurement points to be used). A good example of this challenge is demonstrated in Fig. 3,  
297 which shows how continuous  $g_{sc}$  measurements were correlated with yield performance at

298 different hours of the day (Table 1). Using data from different time periods of the day, we  
299 show that the morning  $g_{sc}$  peak is strongly correlated with TY and PW in the field. In  
300 agreement with our results, a recent study reported high stomatal conductance and  
301 photosynthesis in rice in the early morning [40]. The early morning peak has been reported  
302 on several plants [9,41] was referred to as a "golden hour" [6], due to relatively low VPD and  
303 good light for photosynthesis at this time. In fact, these conditions are allowing the plant to  
304 maintain high productivity with low water loss, thereby achieving optimal WUE. As such,  
305 we suggest that as soon as the plant reaches this point and as high as its  $g_{sc}$  is at this point, it  
306 will be more beneficial to the plant in general and in particular under stress. However, a clear  
307 understanding of the optimal stomatal conductance kinetics throughout the day and during  
308 the entire growing season as it reacts to dynamically changing environmental conditions is  
309 still a challenge. Several models have been proposed to understand the kinetics of stomatal  
310 conductance at leaf level [42–44] and quite a few at the whole plant level [45]. Although  
311 these models are good tools in predicting the kinetics of stomatal response to environment,  
312 still it is not easy to leverage the predicted or directly measured small dynamic responses on  
313 hourly, daily, and seasonal bases and translate it to final yield. Moreover, the fact that our  
314 midday  $g_{sc}$  data was less strongly correlated with field performance is in agreement with the  
315 common practice of measuring  $g_{sc}$  between 10:00 and 14:00 [46,47]. The weak correlation  
316 between midday  $g_{sc}$  and yield could be related to the dynamic patterns of daily whole-plant  
317 water-use efficiency suggested by [6]. Nevertheless, the identification of the best time to  
318 measure each trait and/or weather condition understanding the cumulative effect hourly, daily  
319 seasonal changes in stomatal conductance on plant performance and dynamic water use  
320 might require the use of new data-analysis tools, potentially a data-hungry machine  
321 learning algorithms[48], to create a more comprehensive understanding of our large amount  
322 of data. However, the application of machine learning in plant science is still in its infancy

323 [48]. Moreover, a better understanding of the genetic mechanism governing the morning  
324 peak could contribute to the improvement of crop productivity through breeding, in addition  
325 to yield prediction, as plants use water very efficiently at that time of day. It is also important  
326 to examine many genotypes. For example, the tomato introgression line (IL) population [28]  
327 with multiple years of field data, to verify whether these morning peaks are present in all  
328 genotypes, since the current study used only isogenic lines. This would improve our  
329 understanding of the genetic mechanism for this important trait.

330         The relationship between transpiration and net carbon assimilation or dry weight has  
331 been well studied [49,50]. The reason for this correlation is most likely due to the fact that  
332 CO<sub>2</sub> enters via the same open stomata through which the plant transpires. Indeed, we found  
333 a positive correlation between CT and yield. Yet, this correlation was weaker than the  
334 correlation between morning  $g_{sc}$  and TY ( $r^2 = 0.9$  versus  $r^2 = 0.77$  and  $p = 0.004$  versus  $p$   
335  $=0.04$ , respectively), suggesting that the correlation between CT and CO<sub>2</sub> absorption might  
336 be affected by other environmental factors, such as VPD, radiation and humidity, which are  
337 all known to affect stomatal conductance [51]. On the other hand, CT is a stable, single-point  
338 measurement that is relatively simple to measure, yet it integrates the overall responses of  
339 plants to the environment throughout the experimental period. Nevertheless, these  
340 correlations should be examined in other plant species, as different vegetative stages,  
341 reproductive systems, growth, and development patterns may involve different yield-related  
342 predictive traits.

343         Another goal of this study was to evaluate stress-related traits that could predict yield.  
344 Under water-deficient conditions, the plant undergoes several changes ranging from  
345 molecular and cellular changes to changes at the whole-plant level. This reprogramming of  
346 metabolic pathways and physiological response patterns enables the plant to better cope with  
347 drought stress [52,53]. Many of the physiological responses to stress [e.g., reduced stomatal

348 conductance, damage to the photosynthetic parts, reduced chlorophyll content; [54]] have  
349 dramatic effects on plant productivity. Under stressful conditions, plants enter a protective  
350 or survival mode [53] at the expense of their productive mode [55]. Here, we found that CT  
351 was strongly and positively correlated with TY under well-irrigated conditions, but  
352 negatively correlated with yield under stressful conditions (Fig. 5C). This reversal reflects  
353 the productive-survival transition mode of the plant [55]. Namely, a plant that can maximize  
354 its transpiration under well-irrigated conditions and swiftly minimize it under stressful  
355 conditions is more likely to produce more yield by the end of the season if it recovers quickly  
356 after the stress ends. This is clearly shown in Figure 5B: M82/M82 and TAN/M82 had higher  
357 levels of transpiration pre-stress, but swiftly reduced their transpiration during the stress  
358 period (Fig. 5C) and went back to their high levels of transpiration after recovery (Fig. 5D),  
359 which might have led them to have higher yields than the other lines. Thus, this transition  
360 mode is important for distinguishing plants' stress-response (protective) mode from their  
361 normal growth response (productive mode). An additional important phase of the plant-stress  
362 response is the plant's post-stress performance, often called resilience.

363 Resilience to water limitations, specifically the plant's ability to resume growth and  
364 gain yield after water resumption following drought stress, was acknowledged by [56].  
365 Resilience is considered to be a key trait for crop improvement for water stress [57]. Although  
366 it has not received much attention for some time [58], this trait has been prioritized in some  
367 breeding programs [59]. In this study, we found that the CT of all the treatment periods  
368 together (pre-treatment, drought and the recovery period) and the CT of only the recovery  
369 period each had a strong, positive relationship with TY (Figs. 4B, 5D), suggesting the  
370 importance of this trait for stress-response profiling.

371 Though the lines TAN and ZET were selected for this study due to their well-  
372 characterized yield data, we would like to discuss the contribution of the specific carotenoid

373 mutations to stress response. Carotenoid biosynthesis in roots serve mainly the supply for the  
374 abscisic acid (ABA) and strigolactones precursors,  $\beta$ -carotene and violaxanthin, respectively.  
375 The mutation *tangerine* (TAN) in the gene *Crtiso* and *Zeta* (ZET) in the gene *Ziso* impair  
376 carotene isomerase and  $\zeta$ -carotene isomerase, respectively. Mutations in these enzymes block  
377 carotenoid biosynthesis in their respective states and eliminate downstream xanthophylls in  
378 roots (Fig. S2). The accumulation of carotenoid intermediates in roots of TAN and ZET  
379 indicates that carotenoid biosynthesis does take place in roots. The low concentration of  
380 carotenoids in wild-type roots can be explained, in part, by the synthesis of ABA and  
381 strigolactones in the tomato roots, as reviewed in [40]. ABA deficient in roots in mutants  
382 TAN and ZET is expected to affect the ability of these plants to cope with drought and other  
383 stresses. Our results show that ZET and TAN are prone to slow recovery rates (Fig. 5A, D),  
384 in terms of cumulative and daily transpiration, which probably contributes to their low yields.  
385 Their lower CT levels may be related to their root systems, since both ZET and TAN grafted  
386 as scions on M82 performed a lot better than ZET and TAN when M82 was used as the scion.  
387 In these mutants, carotenoid synthesis is blocked, so intermediate products accumulate. This  
388 blockage is very effective in the roots due to their lack of exposure to light, whereas exposure  
389 to light in the leaves partially compensates for the lack of carotenoid isomerase CRTISO and  
390 ZISO [60,61]. However, this cannot explain the lower yields of ZET and TAN under the  
391 well-irrigated condition. The relatively low yield of TAN plants under the well-irrigated  
392 condition might be linked to the lower concentrations of carotenoids, such as violaxanthin  
393 and neoxanthin, in their flowers, as compared to M82 (Supplemental Fig. S2). Violaxanthin  
394 and neoxanthin are the precursors for ABA synthesis [62], which suggests that ABA might  
395 have been involved in reducing the yields of these mutants. However, this hypothesis needs  
396 to be tested in future research.

## 397 **5. Conclusions**



398           In conclusion, continuous measurements of dynamic traits such as  $g_{sc}$  provide a  
399 dataset that is rich, yet also very challenging to analyze. In our current study, we confirmed  
400 that early morning  $g_{sc}$  is an important physiological trait that can predict yield performance.  
401 Understanding the genetic mechanism underlying early-morning  $g_{sc}$  could be a potential  
402 avenue for breeding programs aimed at developing lines that will perform well under water-  
403 deficit conditions. Furthermore, future data-science tools are likely to improve our  
404 understanding of the mechanisms involved and allow us to use these dynamic traits in yield-  
405 prediction models. On the other hand, the relatively simple trait of CT of young tomato was  
406 proven to be a good predictor of plant biomass and yield performance. The inclusion of CT  
407 in yield models is expected to improve the accuracy and consistency of those models, which  
408 should facilitate the selection of complex traits for water-stress conditions.

409           It is important to note that various crops may present different response profiles, as  
410 well as different levels of susceptibility to a particular type of stress, depending on their  
411 biochemical, physiological and phenological stage.

412           In addition to yield prediction and crop improvement (i.e., at pre-breeding stages),  
413 high-resolution, continuous physiological data could further be exploited to help bridge the  
414 genotype-phenotype gap, by combining the functional-genomics approach with a high-  
415 resolution time axis on a QTL map. This combined approach may help to identify time-  
416 dependent QTLs for dynamic physiological traits such as  $g_{sc}$  and help us to understand the  
417 genetic mechanisms that underlie those dynamic traits if tested for other crops, since our  
418 current work focused only on tomato plants.

419

420 **Table and Figure Legends**

421 **Table 1.** Correlations between the physiological traits of young tomato plants in the  
422 greenhouse and their field-based yield and biomass under well-irrigated conditions; means  
423 of each genotype were used for the correlation. The greenhouse measurements were  
424 categorized as continuous (i.e., whole-canopy stomatal conductance,  $g_{sc}$ ), cumulative or  
425 single-point measurements.  $g_{sc}$  at the three-time periods (morning, midday, and late  
426 afternoon) is obtained by averaging the 3 minutes measurement during each time. All  
427 measurements were taken 1 week before the stress treatment started.  $r^2$  and  $p$ -values indicate  
428 the range of weak to strong correlations.

429 **Fig. 1.** Atmospheric conditions and experimental progress are represented as the fluctuations  
430 in pot weight over the course of the experiment in the greenhouse. **(A)** Daily vapor pressure  
431 deficit (VPD) and photosynthetically active radiation (PAR) during the 29 consecutive days  
432 of the experiment. **(B)** Continuous weight measurements of all the plants during the 29 days  
433 of the experiment. Each line represents one plant/pot. The decreasing slope of the lines during  
434 the day indicates that the system lost weight as the plants transpired. The three sharp peaks  
435 during the nighttime show system weight gain during irrigation events.

436 **Fig. 2.** Plant weight and total yield among three reciprocal-grafted tomatoes grown in the  
437 field. Boxplot showing the differences in **(A)** fresh weights of self-grafted and reciprocal-  
438 graft plants under the well-irrigated condition and **(B)** fresh weights of self-grafted and  
439 reciprocal-graft plants under the limited-irrigation condition. **(C)** Total fruit yield self and  
440 reciprocal-graft plants under the well-irrigated condition and **(D)** Total fruit yield of self and  
441 reciprocal-graft plants under the limited-irrigation condition. Data from 2018 are indicated  
442 in grey (with small letters) and data from the 2019 experiments are indicated in red (with  
443 capital letters). Different letters indicate significantly different means, according to Tukey's  
444 Honest Significant Difference test ( $p < 0.05$ ). Box edges represent the upper and lower

445 quantile with the median value shown as a bold line and mean as a small square in the middle  
446 of the box. Whiskers represent 1.5 times the quantile of the data.

447 **Fig. 3.** The Daily pattern of whole-canopy stomatal conductance ( $g_{sc}(g_{water}-1g_{plant}-1min)$ )  
448 presented as an example of continuous whole-plant physiological measurement. Well-  
449 irrigated M82 tomato plants were used. The line is an average of three days. Data are shown  
450 as means ( $\pm$  SE,  $n=10$ ).

451 **Fig. 4.** Correlations between yield components and cumulative transpiration of different  
452 tomato genotypes. **(A)** Plant vegetative weight in the field, **(B)** total fruit yield, **(C)** green  
453 yield and **(D)** red yield. Measurements taken at harvest time were correlated with the CT  
454 throughout the 29 days of the greenhouse experiment. Symbols are the means  $\pm$  SE of traits  
455 for each genotype under the limited-irrigation condition (circles) and the well-irrigated  
456 condition (square box). Vertical SE ( $n = 12-15$ ), Horizontal SE ( $n = 8-10$ ).

457 **Fig. 5.** The differential contribution of transpiration periods to yield prediction. **(A)** Mean  $\pm$   
458 SE. Daily was transpiration continuously measured during the whole experimental period for  
459 all genotypes. We examined the relative contributions of the three phases for yield prediction:  
460 well-irrigated (green box), drought treatment (orange), and recovery from drought (light  
461 green). CT was measured and correlated with TY for each period: **(B)** pre-treatment, **(C)**  
462 drought period and **(D)** recovery period. Vertical SE ( $n = 12-15$ ) field-based data; horizontal  
463 SE ( $n = 8-10$ ) greenhouse-based data.

464 **Supplementary Fig. S1.** Fruit color and leaf characteristics of M82 and the two mutant lines.

465 **(A, a)** Fruit and leaves of M82. **(B, b)** *Zeta* mutant's fruit and yellowish leaves characteristic.

466 **(C, c)** The *tangerine* mutant's fruit and leaf characteristics.

467 **Supplementary Fig. S2.**

468 Carotenoid concentrations in the **(A)** flowers and **(B)** roots of wild-type (M82), TAN and  
469 ZET plants and their reciprocal combinations ( $\mu\text{g. g}^{-1}$  FW). Roots of wild-type tomato  
470 contained negligible amounts of carotenoids.

471 **Supplementary Fig. S3.** Scatter-plot matrices for traits under the well-irrigated condition in  
472 2018. The figure depicts the matrices of scatter plots and Pearson's correlation coefficients  
473 among the field-measured yield data and yield components correlated with the greenhouse-  
474 based traits of 7 different young tomato plants under the well-irrigated condition. The  
475 windows show Pearson's correlation coefficients ( $r$ ) and bivariate scatter plot matrices with  
476 a density ellipse

477 **Supplementary Fig. S4.** Scatter-plot matrices for traits under the water-deficit condition in  
478 2018. The figure depicts the relationships between field-measured yield and yield  
479 components, and the greenhouse-based traits of 7 different young tomato plants that were  
480 exposed to drought. The windows show Pearson's correlation coefficients ( $r$ ) and bivariate  
481 scatter-plot matrices with a density ellipse

482 **Supplementary Figure 5: Scatter plot matrix for traits under well irrigated conditions in**  
483 **2019.** The relationships between fields measured yield and its components and greenhouse-  
484 based traits of 7 different young tomato plants under irrigated condition. The windows are  
485 Pearson's correlation coefficients ( $r$ ) and bivariate scatter plots matrix with density ellipse.

486 **Supplementary Fig. S6.** Scatter-plot matrices of correlations among studied physiological  
487 yield traits under the water-deficient conditions in 2019. The figure depicts the relationships  
488 between field-measured yield and yield components, and the greenhouse-based traits of 7  
489 different young tomato plants under drought conditions. The windows show Pearson's  
490 correlation coefficients ( $r$ ) and bivariate scatter-plot matrices with a density ellipse.

491

492

493 **Author contributions**

494 Original research plan conceived by MM, DZ and JH, carried out by SG, AK, and IS. SG,  
495 and AK analyzed the data and wrote the MS draft. All authors contributed to the writing,  
496 reviewing, and editing of the manuscript, and have read and approved the final version.

497 **Acknowledgements**

498 The work was funded by the Israel Ministry of Agriculture and Rural Development (Eugene  
499 Kandel Knowledge centers) as part of the “Root of the Matter” – The root zone knowledge  
500 center for leveraging modern agriculture to MM. This research was also supported by the  
501 ISF-NSFC joint research program (grant No. 2436/18) and the United States–Israel  
502 Binational Science Foundation (BSF Grant # 2015100) to MM. D.Z. was funded by  
503 a TOMRES grant (H2020 #727929). J.H.was funded by Israel Science Foundation, ISF  
504 (grant No. 1930/18).

505

506

## References

- 507 [1] O. Halperin, A. Gebremedhin, R. Wallach, M. Moshelion, High-throughput  
508 physiological phenotyping and screening system for the characterization of  
509 plant??environment interactions, *Plant Journal*. 89 (2017) 839–850.  
510 <https://doi.org/10.1111/tpj.13425>.
- 511 [2] E. Tilkat, H. Akdemir, A. Onay, E.A. Tilkat, *Crop Production for Agricultural*  
512 *Improvement*, 2012. <https://doi.org/10.1007/978-94-007-4116-4>.
- 513 [3] J. Polania, I. Rao, C. Cajiao, M. Grajales, M. Rivera, C. Velasquez, B. Raatz, S.  
514 Beebe, Shoot and Root Traits Contribute to Drought Resistance in Recombinant  
515 Inbred Lines of MD 23-24 x SEA 5 of Common Bean, *Frontiers in Plant Science*. 8  
516 (2017) 296. <https://doi.org/10.3389/fpls.2017.00296>.
- 517 [4] L.D.L. Anderegg, W.R.L. Anderegg, J.A. Berry, Not all droughts are created equal:  
518 Translating meteorological drought into woody plant mortality, *Tree Physiology*. 33  
519 (2013) 701–712. <https://doi.org/10.1093/treephys/tpt044>.
- 520 [5] J. Wu, G. Yan, Z. Duan, Z. Wang, C. Kang, L. Guo, K. Liu, J. Tu, J. Shen, B. Yi, T.  
521 Fu, X. Li, C. Ma, C. Dai, Roles of the Brassica napus DELLA Protein BnaA6.RGA,  
522 in Modulating Drought Tolerance by Interacting With the ABA Signaling  
523 Component BnaA10.ABF2, *Frontiers in Plant Science*. 11 (2020).  
524 <https://doi.org/10.3389/fpls.2020.00577>.
- 525 [6] S.C. Gosa, Y. Lupo, M. Moshelion, Quantitative and comparative analysis of whole-  
526 plant performance for functional physiological traits phenotyping: New tools to  
527 support pre-breeding and plant stress physiology studies, *Plant Science*. (2019).  
528 <https://doi.org/10.1016/j.plantsci.2018.05.008>.
- 529 [7] K. Prado, C. Maurel, S. Shabala, S. Beungtae Ryu, L. Hendrik Wegner, Regulation  
530 of leaf hydraulics: from molecular to whole plant levels, 712 (2013) 12–1.  
531 <https://doi.org/10.3389/fpls.2013.00255>.
- 532 [8] Y. Grunwald, N. Wigoda, N. Sade, A. Yaaran, T. Torne, S.C. Gosa, N. Moran, M.  
533 Moshelion, Arabidopsis leaf hydraulic conductance is regulated by xylem sap pH,  
534 controlled, in turn, by a P-type H<sup>+</sup>-ATPase of vascular bundle sheath cells, *Plant*  
535 *Journal*. 106 (2021) 301–313. <https://doi.org/10.1111/tpj.15235>.
- 536 [9] V. Resco de Dios, M.E. Loik, R. Smith, M.J. Aspinwall, D.T. Tissue, Genetic  
537 variation in circadian regulation of nocturnal stomatal conductance enhances carbon  
538 assimilation and growth, *Plant Cell and Environment*. 39 (2016) 3–11.  
539 <https://doi.org/10.1111/pce.12598>.
- 540 [10] T. Kinoshita, M. Doi, N. Suetsugu, T. Kagawa, M. Wada, K. Shimazaki, Phot1 and  
541 phot2 mediate blue light regulation of stomatal opening., *Nature*. 414 (2001) 656–  
542 660. <https://doi.org/10.1038/414656a>.
- 543 [11] T. Horie, M. Yajima, H. Nakagawa, Yield forecasting, *Agricultural Systems*. (1992).  
544 [https://doi.org/10.1016/0308-521X\(92\)90022-G](https://doi.org/10.1016/0308-521X(92)90022-G).

- 545 [12] J. Han, Z. Zhang, J. Cao, Y. Luo, L. Zhang, Z. Li, J. Zhang, Prediction of Winter  
546 Wheat Yield Based on Multi-Source Data and Machine Learning in China, (2020).
- 547 [13] S. Khaki, L. Wang, Crop Yield Prediction Using Deep Neural Networks, (n.d.).
- 548 [14] T. Horie, M. Yajima, H. Nakagawa, Yield forecasting, *Agricultural Systems*. (1992).  
549 [https://doi.org/10.1016/0308-521X\(92\)90022-G](https://doi.org/10.1016/0308-521X(92)90022-G).
- 550 [15] I.H. DeLacy, K.E. Basford, M. Cooper, J.K. Bull, C.G. McLaren, Analysis of multi  
551 environment trials-an historical perspective, *Plant Adaptation and Crop*  
552 *Improvement*. (1996).
- 553 [16] N. Heslot, D. Akdemir, M.E. Sorrells, J.L. Jannink, Integrating environmental  
554 covariates and crop modeling into the genomic selection framework to predict  
555 genotype by environment interactions, *Theoretical and Applied Genetics*. (2014).  
556 <https://doi.org/10.1007/s00122-013-2231-5>.
- 557 [17] J. Crossa, P.L. Cornelius, Sites regression and shifted multiplicative model clustering  
558 of cultivar trial sites under heterogeneity of error variances, *Crop Science*. (1997).  
559 <https://doi.org/10.2135/cropsci1997.0011183X003700020017x>.
- 560 [18] J. Burgueño, J. Crossa, P.L. Cornelius, R.C. Yang, Using factor analytic models for  
561 joining environments and genotypes without crossover genotype x environment  
562 interaction, *Crop Science*. (2008). <https://doi.org/10.2135/cropsci2007.11.0632>.
- 563 [19] O.A. Montesinos-López, A. Montesinos-López, J. Crossa, J.C. Montesinos-López,  
564 D. Mota-Sanchez, F. Estrada-González, J. Gillberg, R. Singh, S. Mondal, P. Juliana,  
565 Prediction of multiple-trait and multiple-environment genomic data using  
566 recommender systems, *G3: Genes, Genomes, Genetics*. (2018).  
567 <https://doi.org/10.1534/g3.117.300309>.
- 568 [20] J. Burgueño, J. Crossa, J.M. Cotes, F.S. Vicente, B. Das, Prediction assessment of  
569 linear mixed models for multi environment trials, *Crop Science*. (2011).  
570 <https://doi.org/10.2135/cropsci2010.07.0403>.
- 571 [21] B. Bahar, M. Yildirim, C. Barutcular, Relationships between stomatal conductance  
572 and yield components in spring durum wheat under Mediterranean conditions,  
573 *Notulae Botanicae Horti Agrobotanici Cluj-Napoca*. 37 (2009) 45–48.  
574 <https://doi.org/10.15835/nbha3723084>.
- 575 [22] R.A. Richards, G.J. Rebetzke, A.G. Condon, A.F. Van Herwaarden, Breeding  
576 opportunities for increasing the efficiency of water use and crop yield in temperate  
577 cereals, *Crop Science*. 42 (2002) 111–121. <https://doi.org/10.2135/cropsci2002.0111>.
- 578 [23] K.A.B. Aisawi, M.P. Reynolds, R.P. Singh, M.J. Foulkes, The physiological basis of  
579 the genetic progress in yield potential of CIMMYT spring wheat cultivars from 1966  
580 to 2009, *Crop Science*. 55 (2015) 1749–1764.  
581 <https://doi.org/10.2135/cropsci2014.09.0601>.
- 582 [24] L.P.R. Teodoro, L.L. Bhering, B.E.L. Gomes, C.N.S. Campos, F.H.R. Baio, R.  
583 Gava, C.A. da Silva, P.E. Teodoro, Understanding the combining ability for

- 584 physiological traits in soybean, PLoS ONE. 14 (2019) 1–13.  
585 <https://doi.org/10.1371/journal.pone.0226523>.
- 586 [25] D. Roche, Stomatal Conductance Is Essential for Higher Yield Potential of C3  
587 Crops, *Critical Reviews in Plant Sciences*. (2015).  
588 <https://doi.org/10.1080/07352689.2015.1023677>.
- 589 [26] M. Faralli, T. Lawson, Natural genetic variation in photosynthesis: an untapped  
590 resource to increase crop yield potential?, *Plant Journal*. (2020).  
591 <https://doi.org/10.1111/tpj.14568>.
- 592 [27] H. Pirasteh-Anosheh, A. Saed-Moucheshi, H. Pakniyat, M. Pessarakli, Stomatal  
593 responses to drought stress, in: *Water Stress and Crop Plants: A Sustainable*  
594 *Approach*, 2016. <https://doi.org/10.1002/9781119054450.ch3>.
- 595 [28] Y. Eshed, D. Zamir, An introgression line population of *Lycopersicon pennellii* in  
596 the cultivated tomato enables the identification and fine mapping of yield- associated  
597 QTL, *Genetics*. (1995).
- 598 [29] U. Karniel, A. Koch, D. Zamir, J. Hirschberg, Development of zeaxanthin-rich  
599 tomato fruit through genetic manipulations of carotenoid biosynthesis, *Plant*  
600 *Biotechnology Journal*. (2020). <https://doi.org/10.1111/pbi.13387>.
- 601 [30] T. Isaacson, G. Ronen, D. Zamir, J. Hirschberg, Cloning of tangerine from tomato  
602 reveals a Carotenoid isomerase essential for the production of  $\beta$ -carotene and  
603 xanthophylls in plants, *Plant Cell*. 14 (2002) 333–342.  
604 <https://doi.org/10.1105/tpc.010303>.
- 605 [31] D.E. Kachanovsky, S. Filler, T. Isaacson, J. Hirschberg, Epistasis in tomato color  
606 mutations involves regulation of phytoene synthase 1 expression by cis-carotenoids,  
607 *Proceedings of the National Academy of Sciences*. 109 (2012) 19021–19026.  
608 <https://doi.org/10.1073/pnas.1214808109>.
- 609 [32] J. Hirschberg, Carotenoid biosynthesis in flowering plants, *Current Opinion in Plant*  
610 *Biology*. 4 (2001) 210–218. [https://doi.org/10.1016/S1369-5266\(00\)00163-1](https://doi.org/10.1016/S1369-5266(00)00163-1).
- 611 [33] E.M.A. Enfissi, M. Nogueira, P.M. Bramley, P.D. Fraser, The regulation of  
612 carotenoid formation in tomato fruit, *The Plant Journal*. 89 (2017) 774–788.  
613 <https://doi.org/https://doi.org/10.1111/tpj.13428>.
- 614 [34] U. Karniel, A. Koch, D. Zamir, J. Hirschberg, Development of zeaxanthin-rich  
615 tomato fruit through genetic manipulations of carotenoid biosynthesis, *Plant*  
616 *Biotechnology Journal*. (2020). <https://doi.org/10.1111/pbi.13387>.
- 617 [35] A. Dalal, I. Shenhar, R. Bourstein, A. Mayo, Y. Grunwald, N. Averbuch, Z. Attia, R.  
618 Wallach, M. Moshelion, A telemetric, gravimetric platform for real-time  
619 physiological phenotyping of plant–environment interactions, *Journal of Visualized*  
620 *Experiments*. (2020). <https://doi.org/10.3791/61280>.
- 621 [36] O. Halperin, A. Gebremedhin, R. Wallach, M. Moshelion, High-throughput  
622 physiological phenotyping and screening system for the characterization of



- 623 plant??environment interactions, *Plant Journal*. 89 (2017) 839–850.  
624 <https://doi.org/10.1111/tpj.13425>.
- 625 [37] D. Roche, Stomatal Conductance Is Essential for Higher Yield Potential of C3  
626 Crops, *Critical Reviews in Plant Sciences*. (2015).  
627 <https://doi.org/10.1080/07352689.2015.1023677>.
- 628 [38] M. Faralli, T. Lawson, Natural genetic variation in photosynthesis: an untapped  
629 resource to increase crop yield potential?, *Plant Journal*. (2020).  
630 <https://doi.org/10.1111/tpj.14568>.
- 631 [39] K. Iseki, O. Olaleye, A new indicator of leaf stomatal conductance based on thermal  
632 imaging for field grown cowpea, *Plant Production Science*. 23 (2020) 136–147.  
633 <https://doi.org/10.1080/1343943X.2019.1625273>.
- 634 [40] T. Du, P. Meng, J. Huang, S. Peng, D. Xiong, Fast photosynthesis measurements for  
635 phenotyping photosynthetic capacity of rice, *Plant Methods*. (2020).  
636 <https://doi.org/10.1186/s13007-020-0553-2>.
- 637 [41] T.J. Brodribb, N.M. Holbrook, Diurnal depression of leaf hydraulic conductance in a  
638 tropical tree species, *Plant, Cell and Environment*. 27 (2004) 820–827.  
639 <https://doi.org/10.1111/j.1365-3040.2004.01188.x>.
- 640 [42] D. a Grantz, E. Zeiger, Stomatal responses to light and leaf-air water vapor pressure  
641 difference show similar kinetics in sugarcane and soybean., *Plant Physiology*. 81  
642 (1986) 865–8. <https://doi.org/10.1104/pp.81.3.865>.
- 643 [43] L. McAusland, S. Vialet-Chabrand, P. Davey, N.R. Baker, O. Brendel, T. Lawson,  
644 Effects of kinetics of light-induced stomatal responses on photosynthesis and water-  
645 use efficiency, *The New Phytologist*. (2016). <https://doi.org/10.1111/nph.14000>.
- 646 [44] S.R.M. Vialet-Chabrand, J.S.A. Matthews, L. McAusland, M.R. Blatt, H. Griffiths,  
647 T. Lawson, Temporal dynamics of stomatal behavior: Modeling and implications for  
648 photosynthesis and water use, *Plant Physiology*. (2017).  
649 <https://doi.org/10.1104/pp.17.00125>.
- 650 [45] D. Eyland, J. van Wesemael, T. Lawson, S. Carpentier, The impact of slow stomatal  
651 kinetics on photosynthesis and water use efficiency under fluctuating light, *Plant*  
652 *Physiology*. 186 (2021) 998–1012. <https://doi.org/10.1093/plphys/kiab114>.
- 653 [46] J.W. Gooch, Centimeter, 2011. [https://doi.org/10.1007/978-1-4419-6247-8\\_2144](https://doi.org/10.1007/978-1-4419-6247-8_2144).
- 654 [47] S.L. Roberts, X. Dun, R.D.S. Doddrell, T. Mindos, L.K. Drake, M.W. Onaitis, F.  
655 Florio, A. Quattrini, D. Antonio, D.B. Parkinson, 1 . 1., (2017) 1–19.  
656 <https://doi.org/10.1242/dev.150656>.
- 657 [48] P.S. Soltis, G. Nelson, A. Zare, E.K. Meineke, Plants meet machines: Prospects in  
658 machine learning for plant biology, *Applications in Plant Sciences*. 8 (2020) 1–6.  
659 <https://doi.org/10.1002/aps3.11371>.

- 660 [49] J.A. Tolck, T.A. Howell, Transpiration and yield relationships of grain sorghum  
661 grown in a field environment, *Agronomy Journal*. 101 (2009) 657–662.  
662 <https://doi.org/10.2134/agronj2008.0079x>.
- 663 [50] C. de Wit, Transpiration and crop yields., *Versl. Landbouwk. Onderz.* 64. 6. (1958)  
664 18–20. <https://doi.org/>.
- 665 [51] J. Zhang, H. Jiang, X. Song, J. Jin, X. Zhang, The responses of plant leaf CO<sub>2</sub>/H<sub>2</sub>O  
666 exchange and water use efficiency to drought: A meta-analysis, *Sustainability*  
667 (Switzerland). 10 (2018) 1–13. <https://doi.org/10.3390/su10020551>.
- 668 [52] Y. Jiang, B. Huang, Drought and heat stress injury to two cool-season turfgrasses in  
669 relation to antioxidant metabolism and lipid peroxidation, *Crop Science*. (2001).  
670 <https://doi.org/10.2135/cropsci2001.412436x>.
- 671 [53] H. Claeys, D. Inzé, The agony of choice: How plants balance growth and survival  
672 under water-limiting conditions, *Plant Physiology*. 162 (2013) 1768–1779.  
673 <https://doi.org/10.1104/pp.113.220921>.
- 674 [54] J. Fu, B. Huang, Involvement of antioxidants and lipid peroxidation in the adaptation  
675 of two cool-season grasses to localized drought stress, *Environmental and*  
676 *Experimental Botany*. (2001). [https://doi.org/10.1016/S0098-8472\(00\)00084-8](https://doi.org/10.1016/S0098-8472(00)00084-8).
- 677 [55] M. Moshelion, The dichotomy of yield and drought resistance, *EMBO Reports*.  
678 (2020) 1–7. <https://doi.org/10.15252/embr.202051598>.
- 679 [56] Y. Fang, L. Xiong, General mechanisms of drought response and their application in  
680 drought resistance improvement in plants, *Cellular and Molecular Life Sciences*.  
681 (2015). <https://doi.org/10.1007/s00018-014-1767-0>.
- 682 [57] A. Dalal, R. Bourstein, N. Haish, I. Shenhar, R. Wallach, M. Moshelion, Dynamic  
683 physiological phenotyping of drought-stressed pepper plants treated with  
684 “productivity-enhancing” and “survivability-enhancing” biostimulants, *Frontiers in*  
685 *Plant Science*. (2019). <https://doi.org/10.3389/fpls.2019.00905>.
- 686 [58] D. Chen, S. Wang, B. Cao, D. Cao, G. Leng, H. Li, L. Yin, L. Shan, X. Deng,  
687 Genotypic variation in growth and physiological response to drought stress and re-  
688 watering reveals the critical role of recovery in drought adaptation in maize  
689 seedlings, *Frontiers in Plant Science*. (2016).  
690 <https://doi.org/10.3389/fpls.2015.01241>.
- 691 [59] R. Chapuis, C. Delluc, R. Debeuf, F. Tardieu, C. Welcker, Resiliences to water  
692 deficit in a phenotyping platform and in the field: How related are they in maize?,  
693 *European Journal of Agronomy*. (2012). <https://doi.org/10.1016/j.eja.2011.12.006>.
- 694 [60] T. Isaacson, G. Ronen, D. Zamir, J. Hirschberg, Cloning of tangerine from tomato  
695 reveals a Carotenoid isomerase essential for the production of  $\beta$ -carotene and  
696 xanthophylls in plants, *Plant Cell*. 14 (2002) 333–342.  
697 <https://doi.org/10.1105/tpc.010303>.

- 698 [61] E. Fantini, G. Falcone, S. Frusciante, L. Giliberto, G. Giuliano, Dissection of tomato  
699 lycopene biosynthesis through virus-induced gene silencing, *Plant Physiology*. 163  
700 (2013) 986–998. <https://doi.org/10.1104/pp.113.224733>.
- 701 [62] N. Galpaz, Q. Wang, N. Menda, D. Zamir, J. Hirschberg, Abscisic acid deficiency in  
702 the tomato mutant high-pigment 3 leading to increased plastid number and higher  
703 fruit lycopene content, *Plant Journal*. (2008). [https://doi.org/10.1111/j.1365-](https://doi.org/10.1111/j.1365-313X.2007.03362.x)  
704 [313X.2007.03362.x](https://doi.org/10.1111/j.1365-313X.2007.03362.x).
- 705

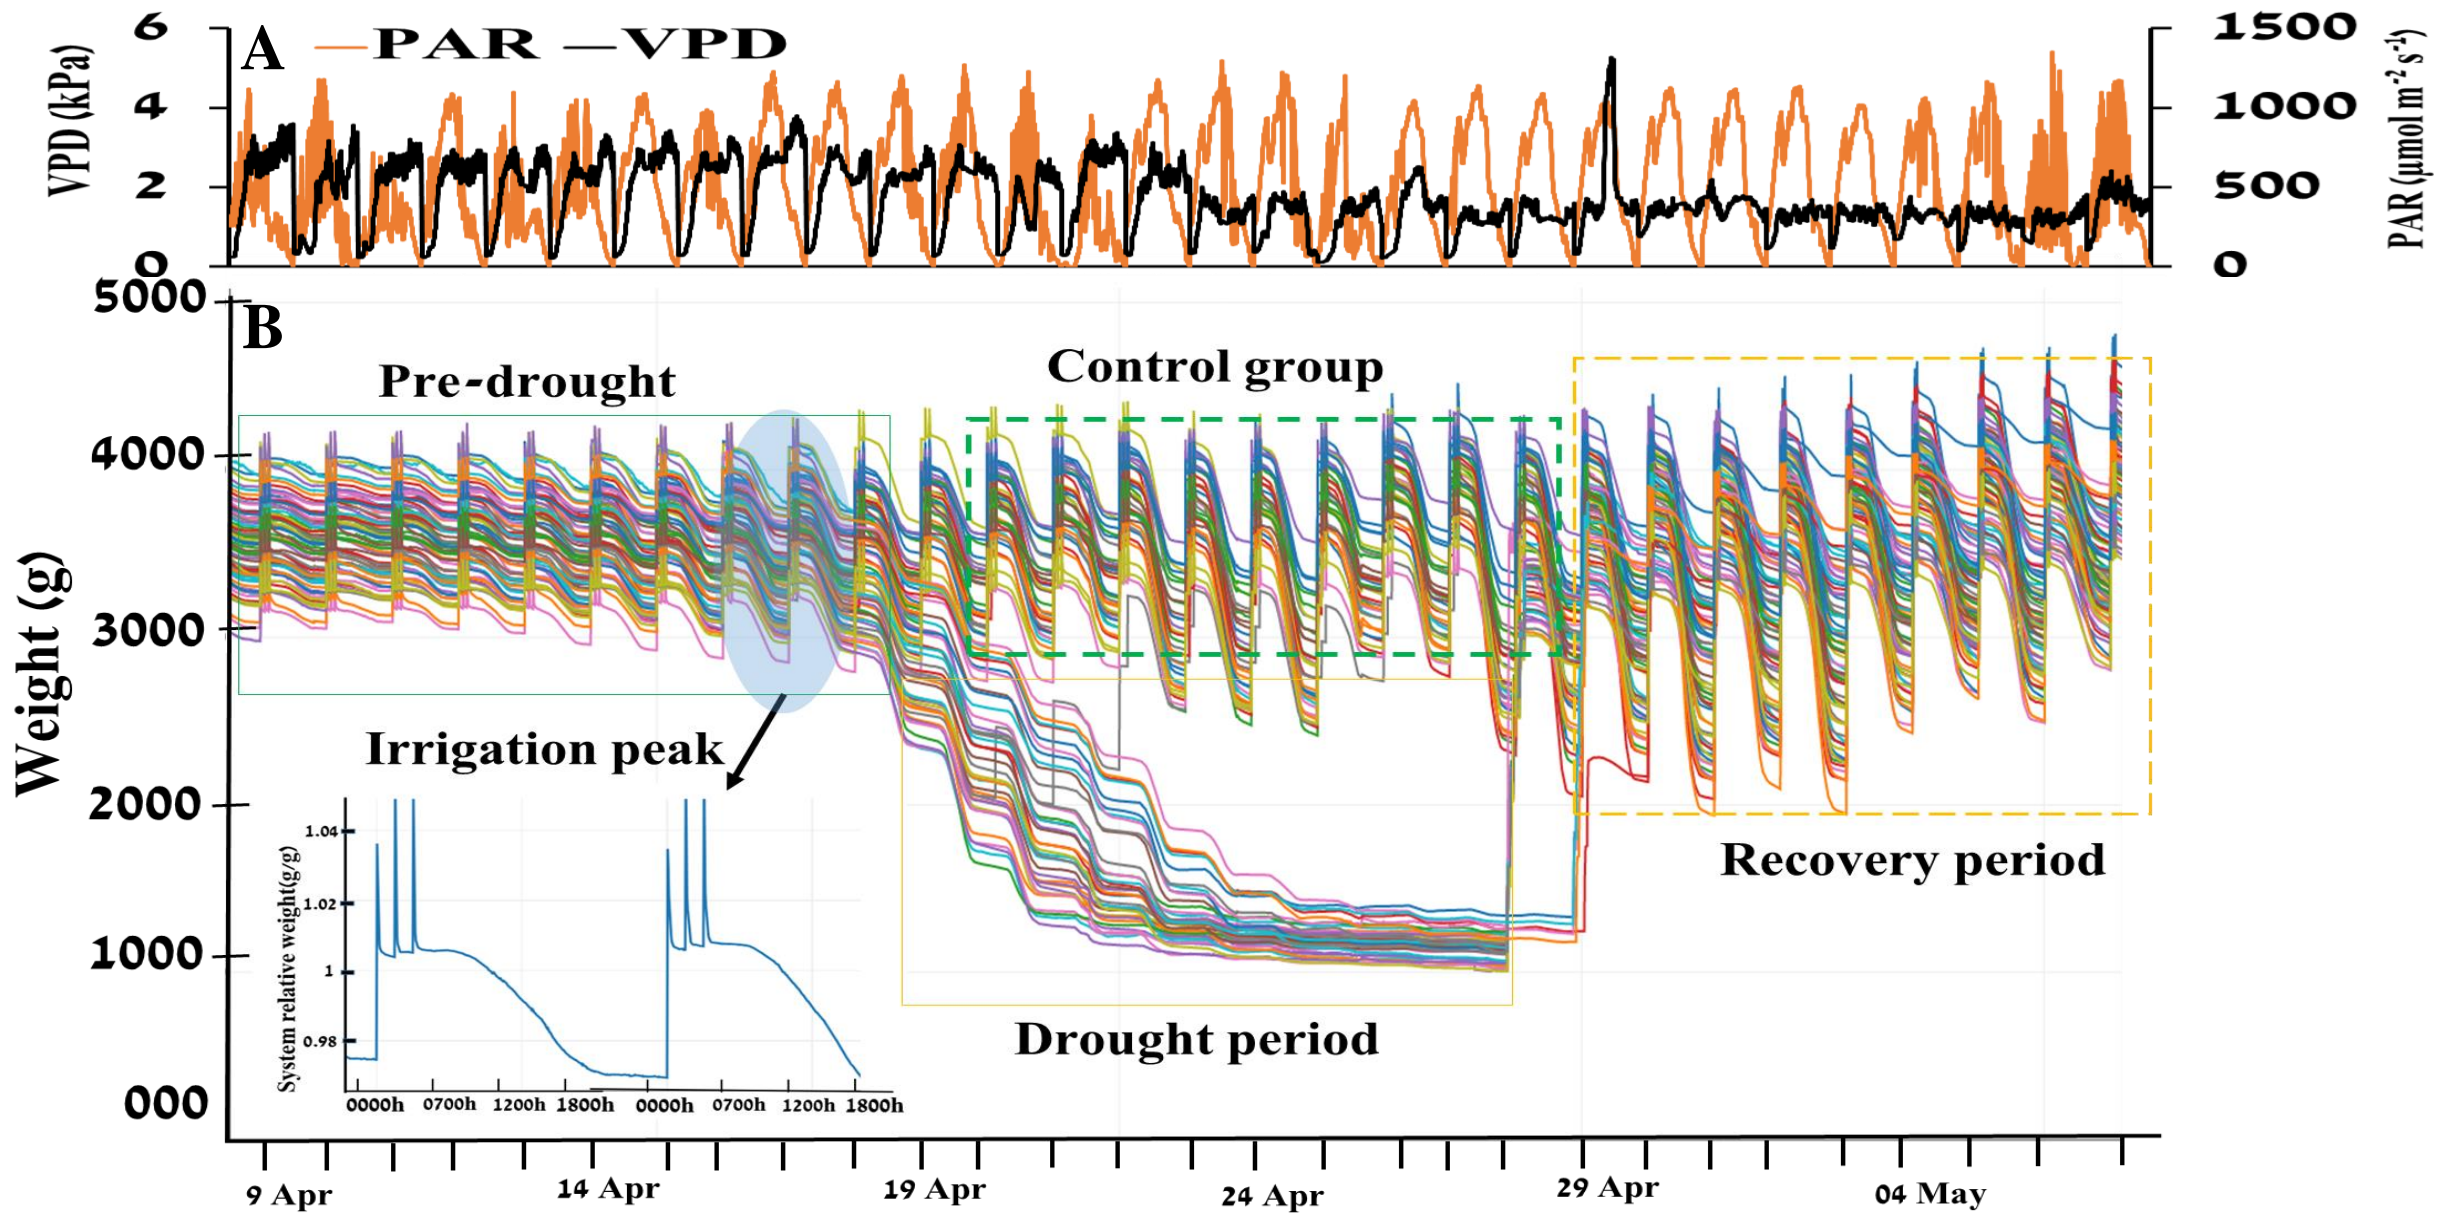

**Fig. 1.** Atmospheric conditions and experimental progress are represented as the fluctuations in pot weight over the course of the experiment in the greenhouse. **(A)** Daily vapor pressure deficit (VPD) and photosynthetically active radiation (PAR) during the 29 consecutive days of the experiment. **(B)** Continuous weight measurements of all the plants during the 29 days of the experiment. Each line represents one plant/pot. The decreasing slope of the lines during the day indicates that the system lost weight as the plants transpired. The three sharp peaks during the nighttime show system weight gain during irrigation events.

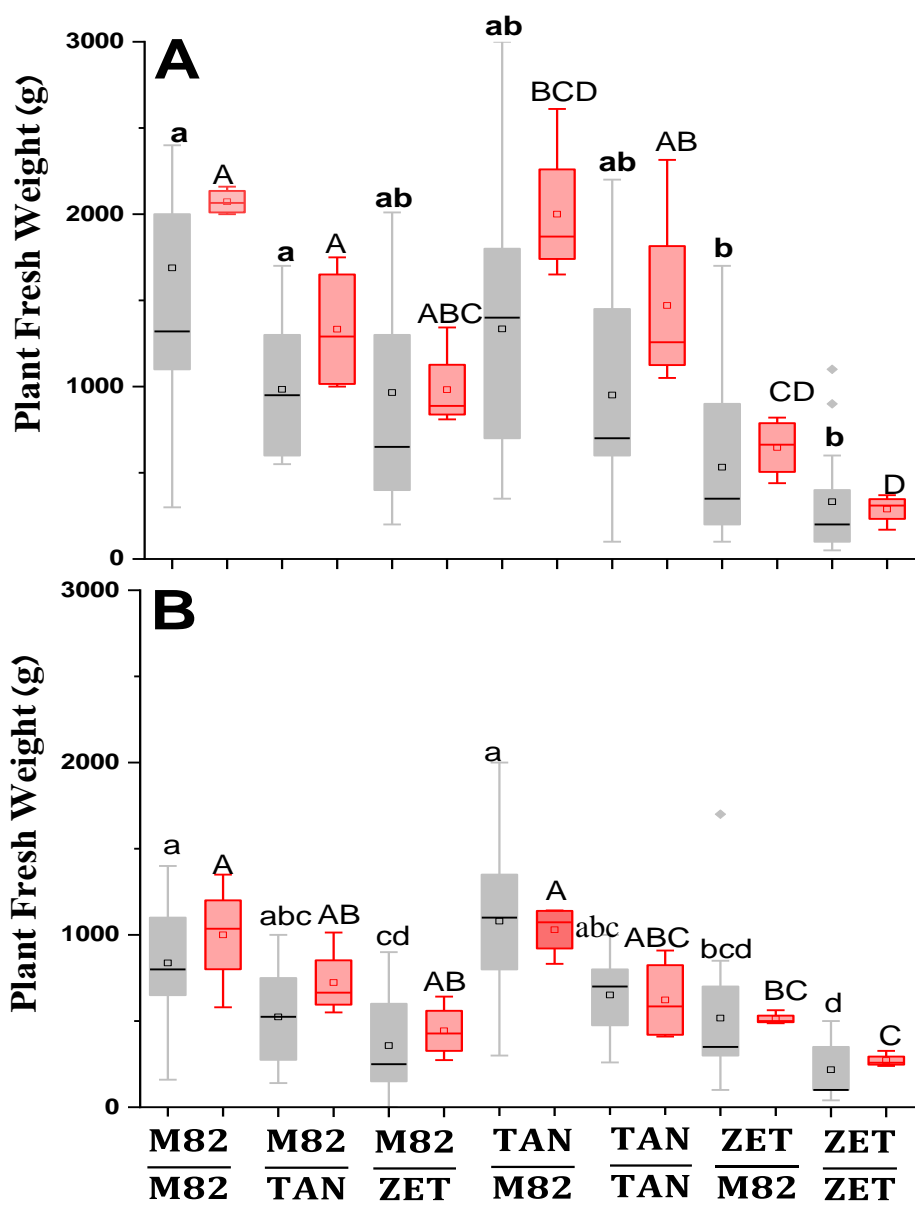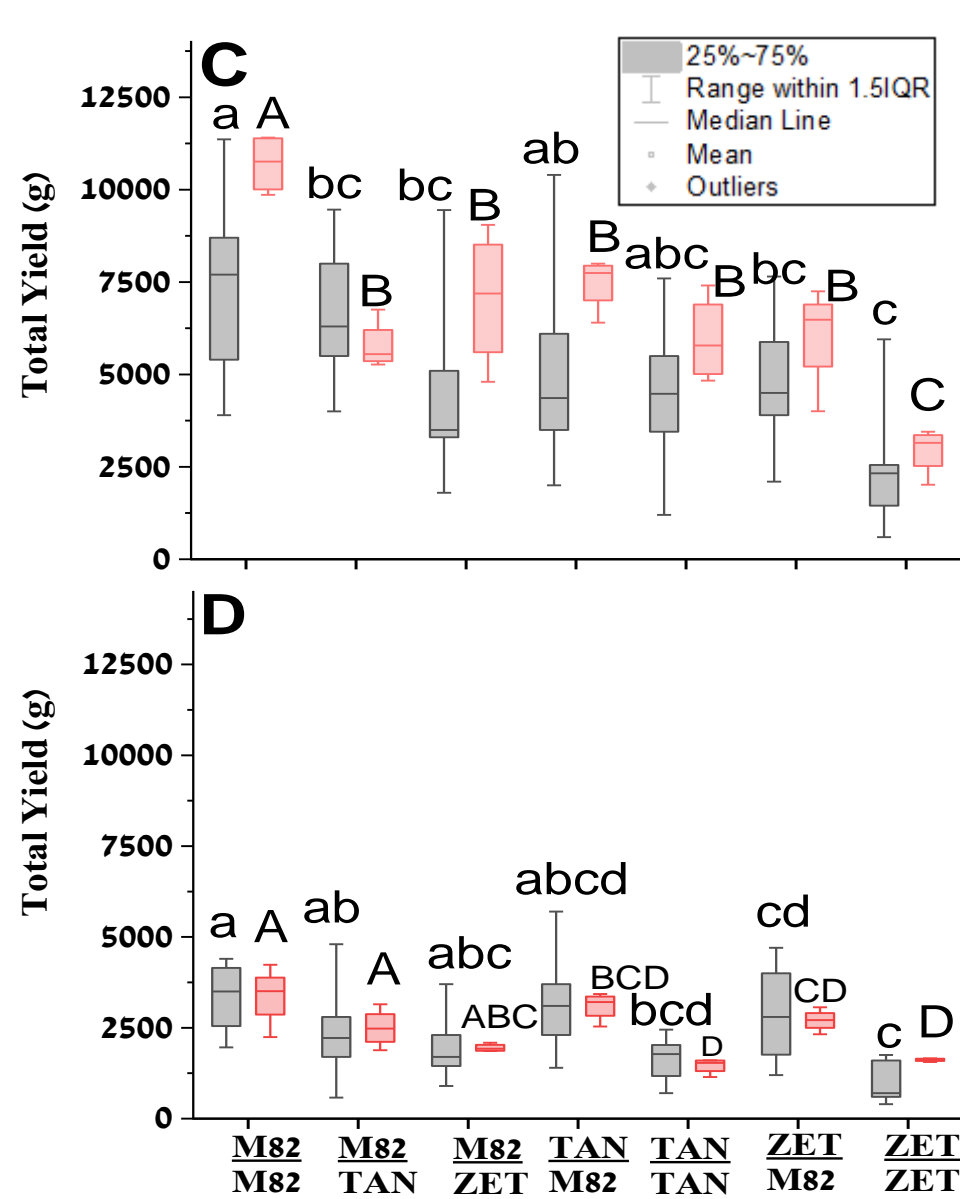

**Fig. 2.** Plant weight and total yield among three reciprocal-grafted tomatoes grown in the field. Boxplot showing the differences in (A) fresh weights of self-grafted and reciprocal-graft plants under the well-irrigated condition and (B) fresh weights of self-grafted and reciprocal-graft plants under the limited-irrigation condition. (C) Total fruit yield self and reciprocal-graft plants under the well-irrigated condition and (D) Total fruit yield of self and reciprocal-graft plants under the limited-irrigation condition. Data from 2018 are indicated in grey (with small letters) and data from the 2019 experiments are indicated in red (with capital letters). Different letters indicate significantly different means, according to Tukey's Honest Significant Difference test ( $p < 0.05$ ). Box edges represent the upper and lower quantile with the median value shown as a bold line and mean as a small square in the middle of the box. Whiskers represent 1.5 times the quantile of the data.

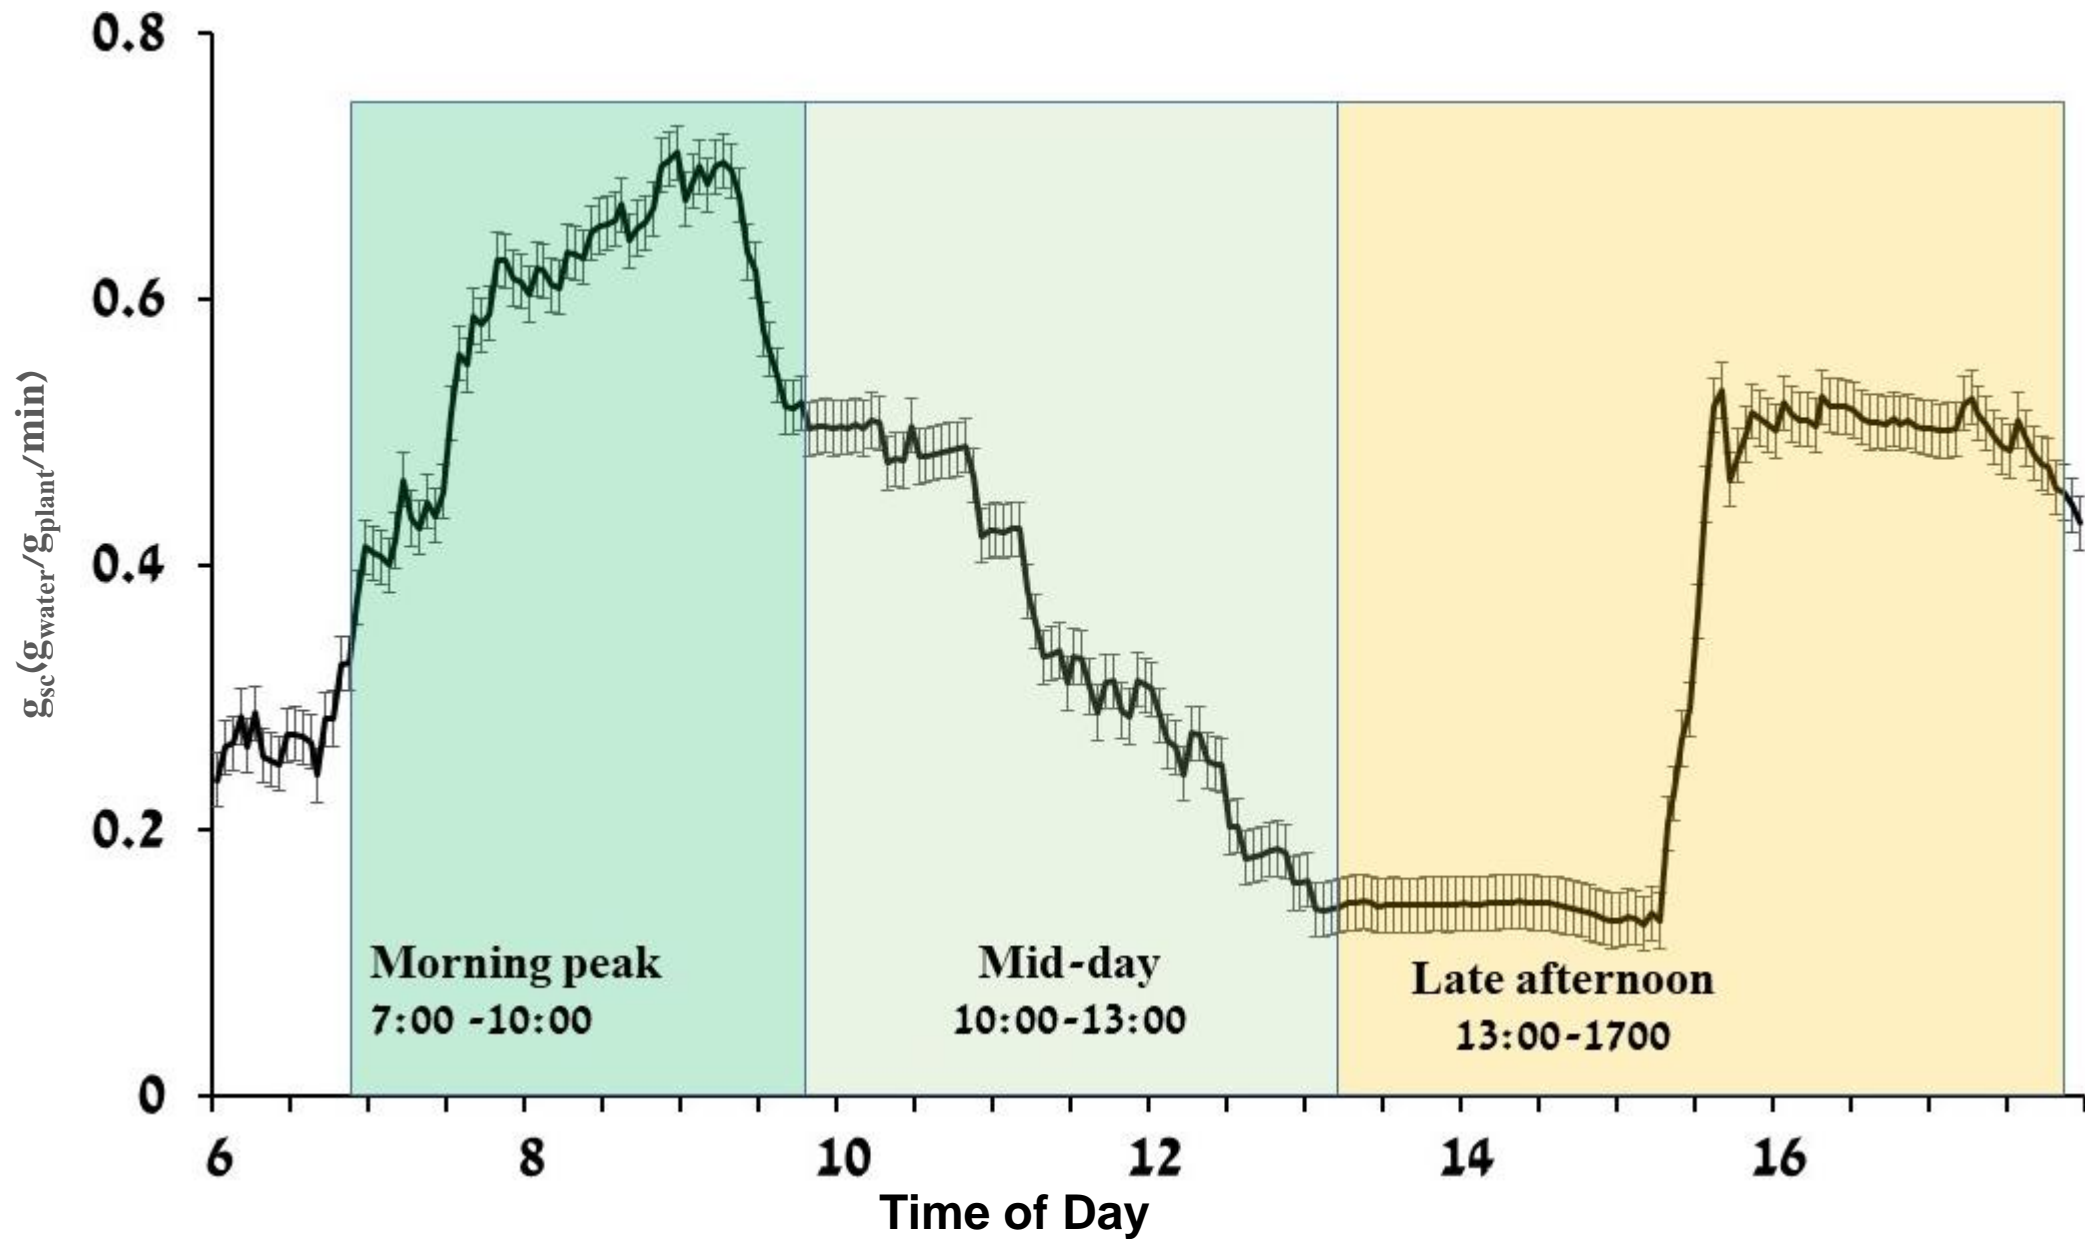

**Fig. 3.** The Daily pattern of whole-canopy stomatal conductance ( $g_{sc}(\text{g}_{\text{water}}-\text{g}_{\text{plant}}^{-1}\text{min}^{-1})$ ) presented as an example of continuous whole-plant physiological measurement. Well-irrigated M82 tomato plants were used. The line is an average of three days. Data are shown as means ( $\pm$  SE,  $n=10$ ).

|                               |              | Field-Based Measurements |                |                      |               |                |
|-------------------------------|--------------|--------------------------|----------------|----------------------|---------------|----------------|
|                               |              | Total Yield              |                | Plant fresh weight   |               |                |
|                               |              | R <sup>2</sup> range     | p-Value ranges | R <sup>2</sup> range | p-Value range |                |
| Greenhouse-Based Measurements | Continuous   | $g_{sc}(7:00-10:00)$     | 0.55 to 0.90   | 0.19 to 0.004        | 0.2 to 0.60   | 0.62 to 0.14   |
|                               |              | $g_{sc}(10:00-13:00)$    | 0.45 to 0.72   | 0.304 to 0.067       | 0.44 to 0.89  | 0.32 to 0.006  |
|                               |              | $g_{sc}(13:00-16:00)$    | 0.34 to 0.71   | 0.447 to 0.073       | 0.74 to 0.93  | 0.054 to 0.002 |
|                               | Single point | Cumulative transpiration | 0.77           | 0.04                 | 0.94          | 0.001          |
|                               |              | Growth rate              | 0.62           | 0.12                 | 0.89          | 0.0065         |
|                               |              | Plant net weight         | 0.70           | 0.076                | 0.79          | 0.038          |

**Table 1.** Correlations between the physiological traits of young tomato plants in the greenhouse and their field-based yield and biomass under well-irrigated conditions; means of each genotype were used for the correlation. The greenhouse measurements were categorized as continuous (i.e., whole-canopy stomatal conductance,  $g_{sc}$ ), cumulative or single-point measurements.  $g_{sc}$  at the three-time periods (morning, midday, and late afternoon) is obtained by averaging the 3 minutes measurement during each time. All measurements were taken 1 week before the stress treatment started.  $r^2$  and  $p$ -values indicate the range of weak to strong correlations.





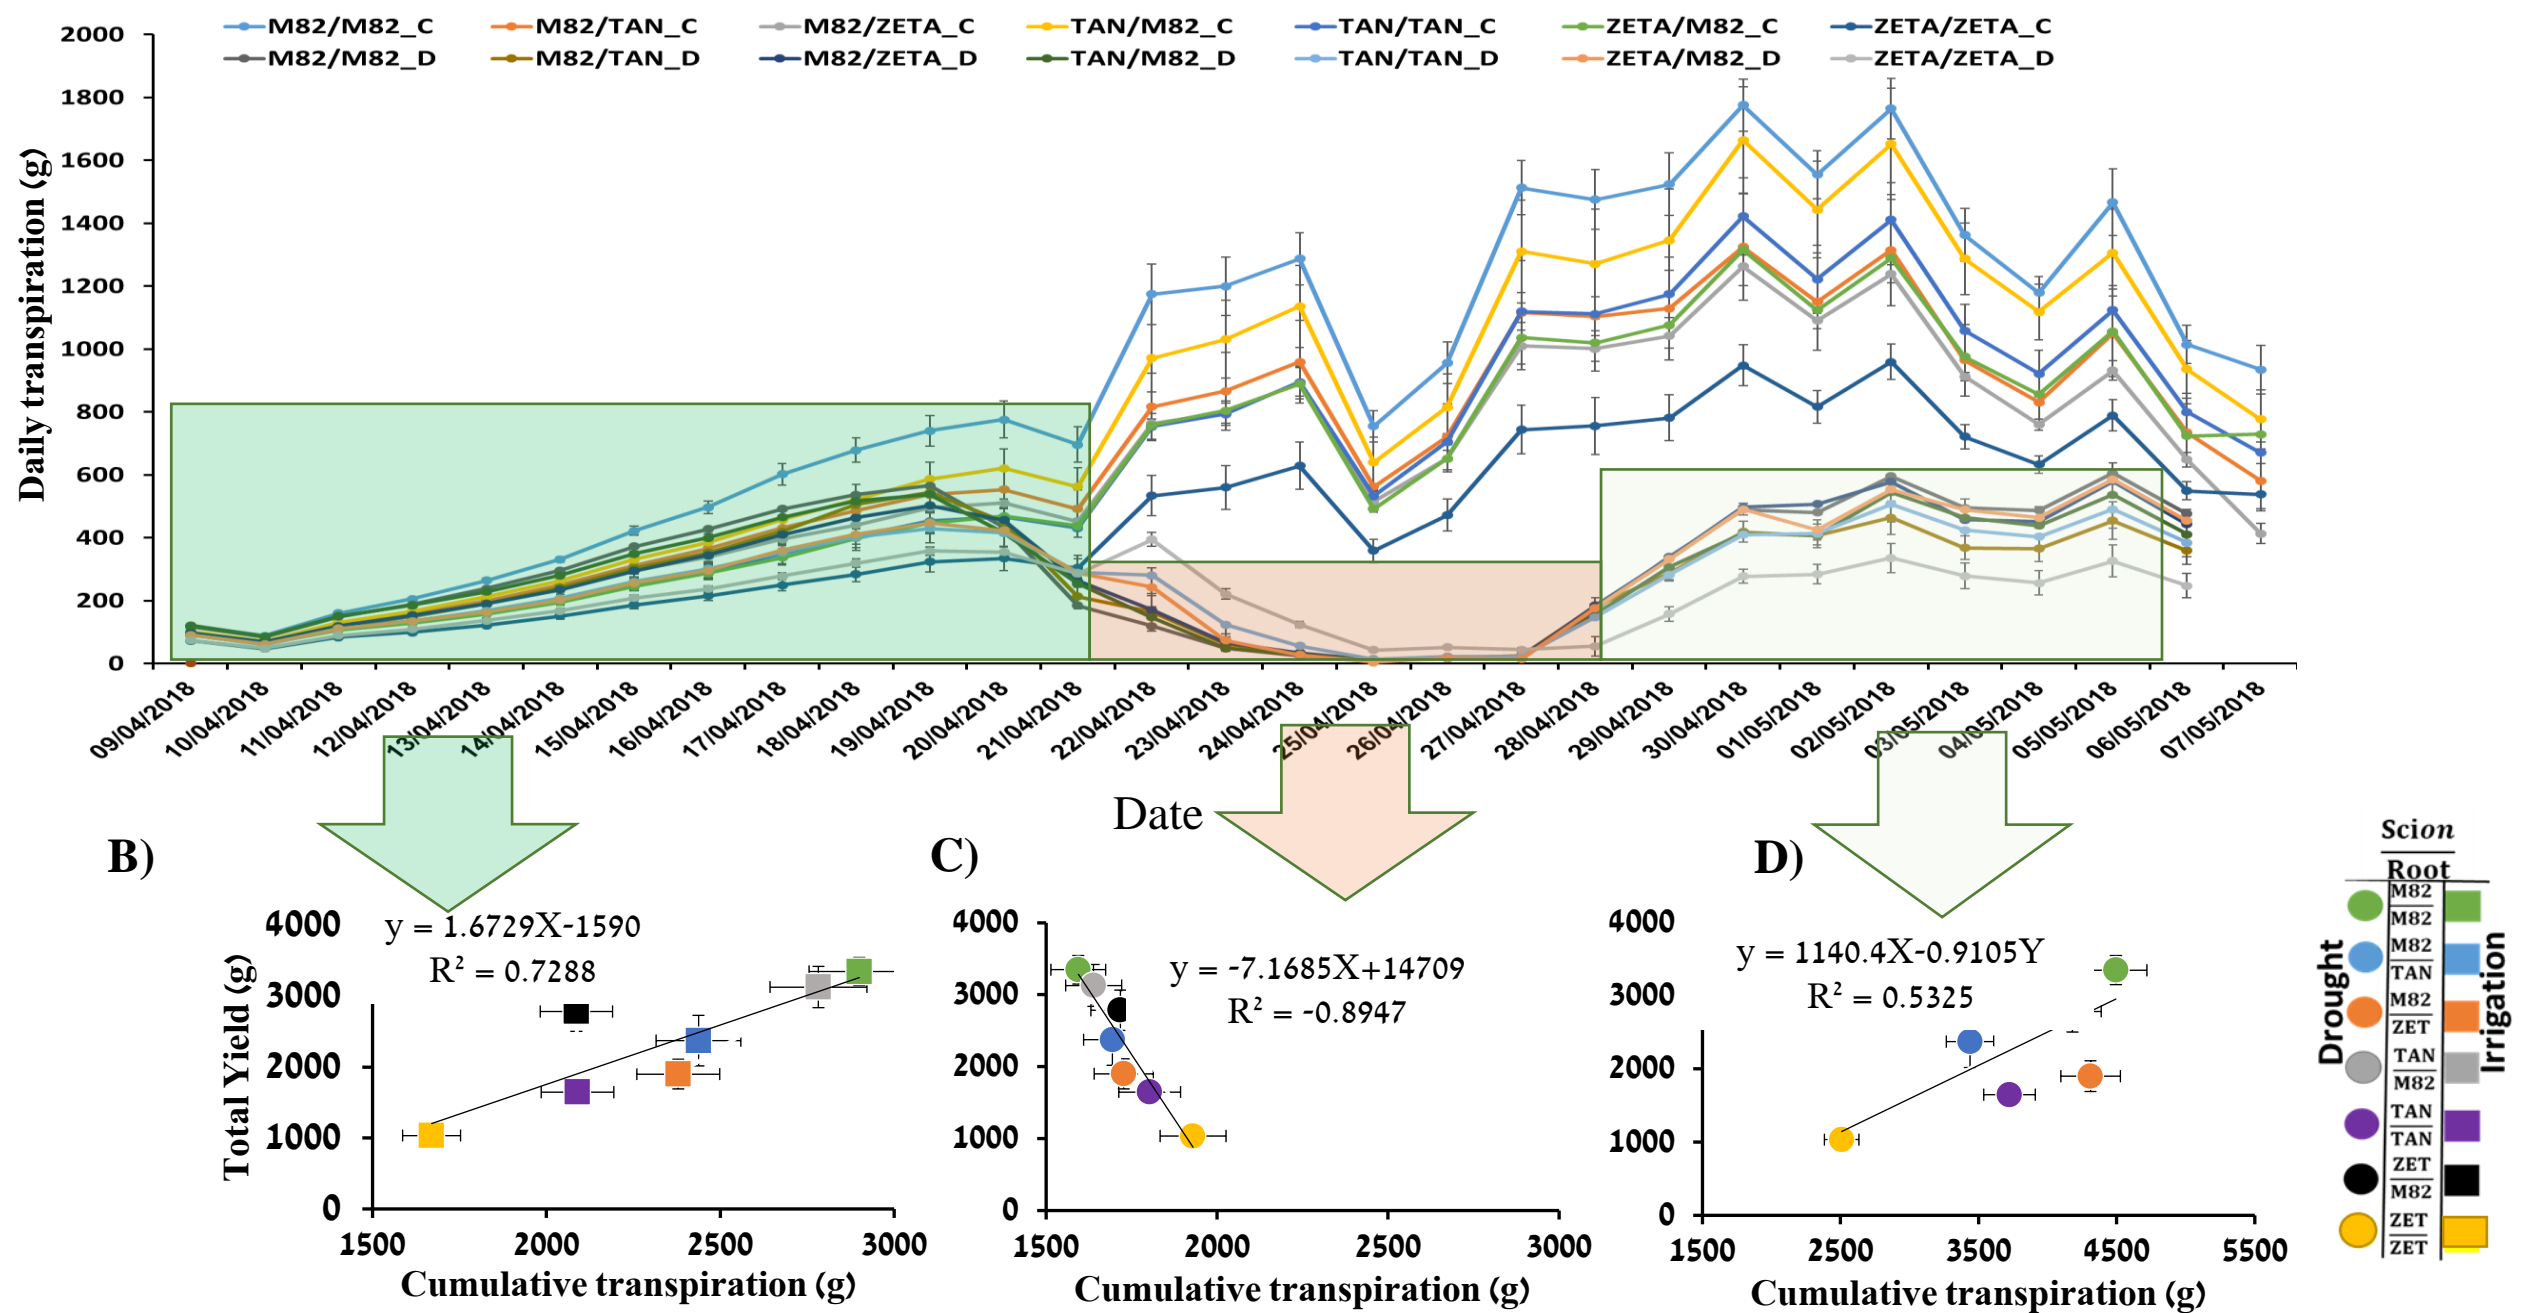

**Fig. 5.** The differential contribution of transpiration periods to yield prediction. (A) Mean  $\pm$  SE. Daily was transpiration continuously measured during the whole experimental period for all genotypes. We examined the relative contributions of the three phases for yield prediction: well-irrigated (green box), drought treatment (orange), and recovery from drought (light green). CT was measured and correlated with TY for each period: (B) pre-treatment, (C) drought period and (D) recovery period. Vertical SE ( $n = 12-15$ ) field-based data; horizontal SE ( $n = 8-10$ ) greenhouse-based data.

Supplementary figures

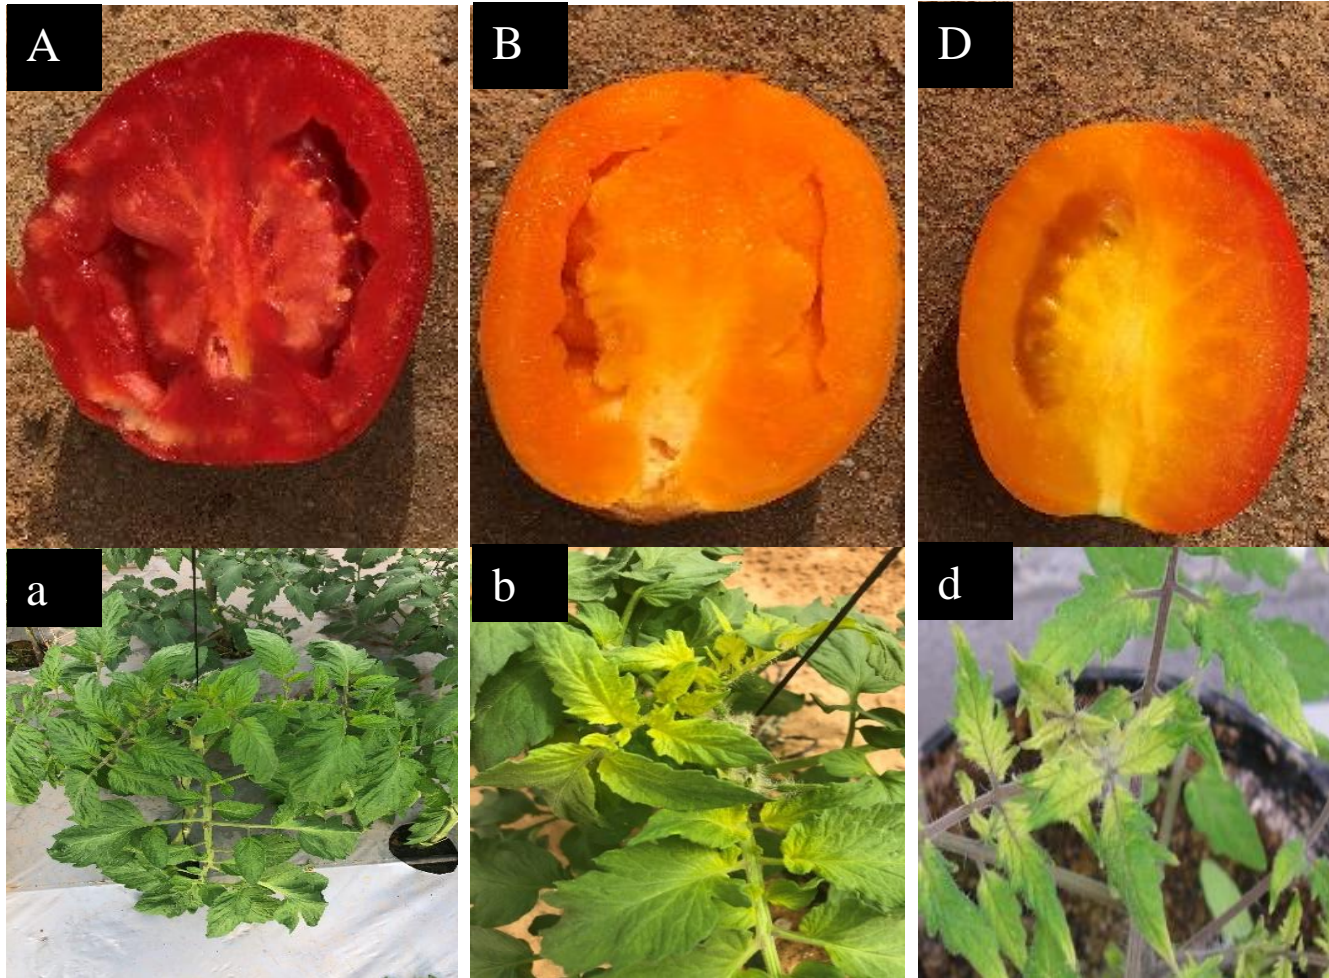

**Supplementary Fig. S1.** Fruit color and leaf characteristics of M82 and the two mutant lines. (A, a) Fruit and leaves of M82. (B, b) *Zeta* mutant's fruit and yellowish leaves characteristic. (C, c) The *tangerine* mutant's fruit and leaf characteristics.

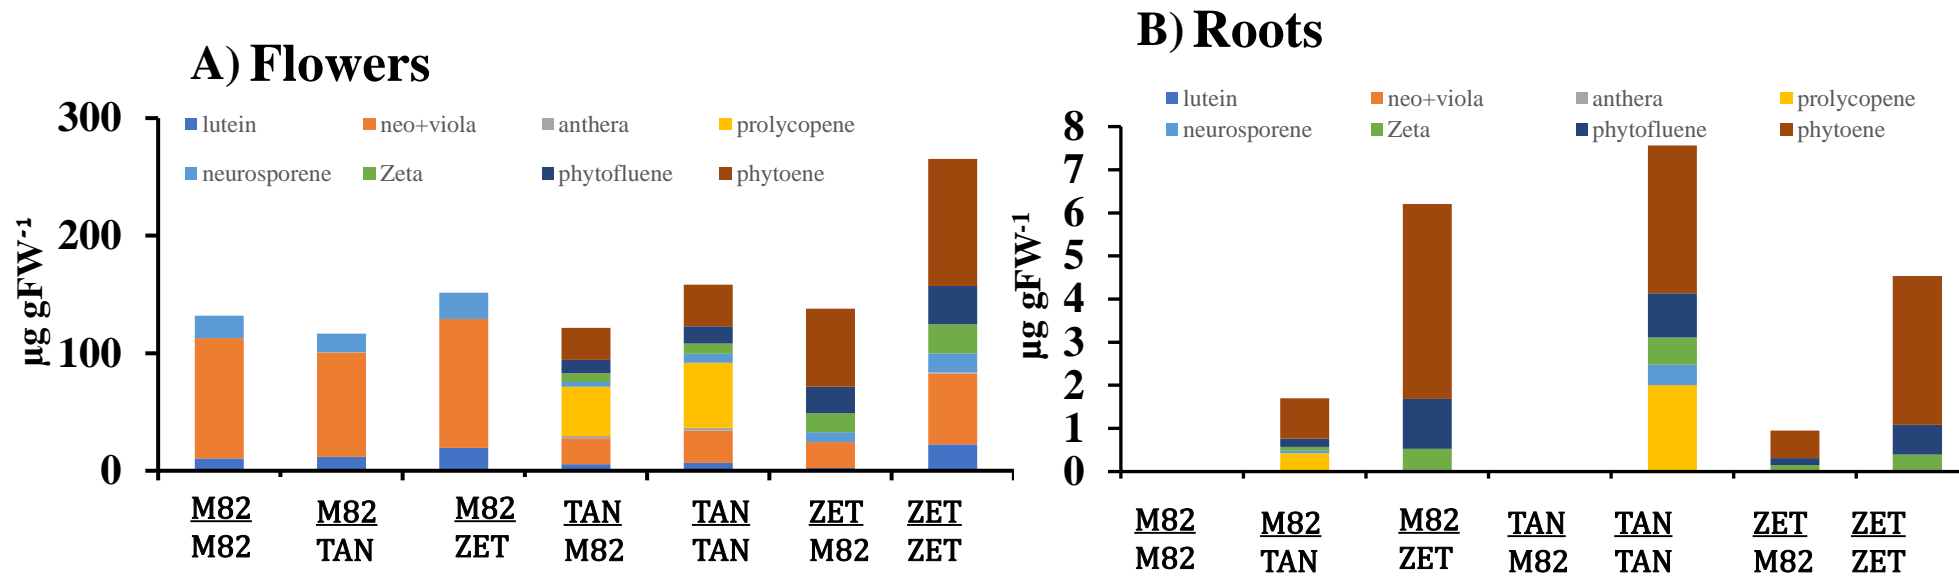

**Supplementary Fig. S2.**

Carotenoid concentrations in the (A) flowers and (B) roots of wild-type (M82), TAN and ZET plants and their reciprocal combinations ( $\mu\text{g. g}^{-1}$  FW). Roots of wild-type tomato contained negligible amounts of carotenoids.

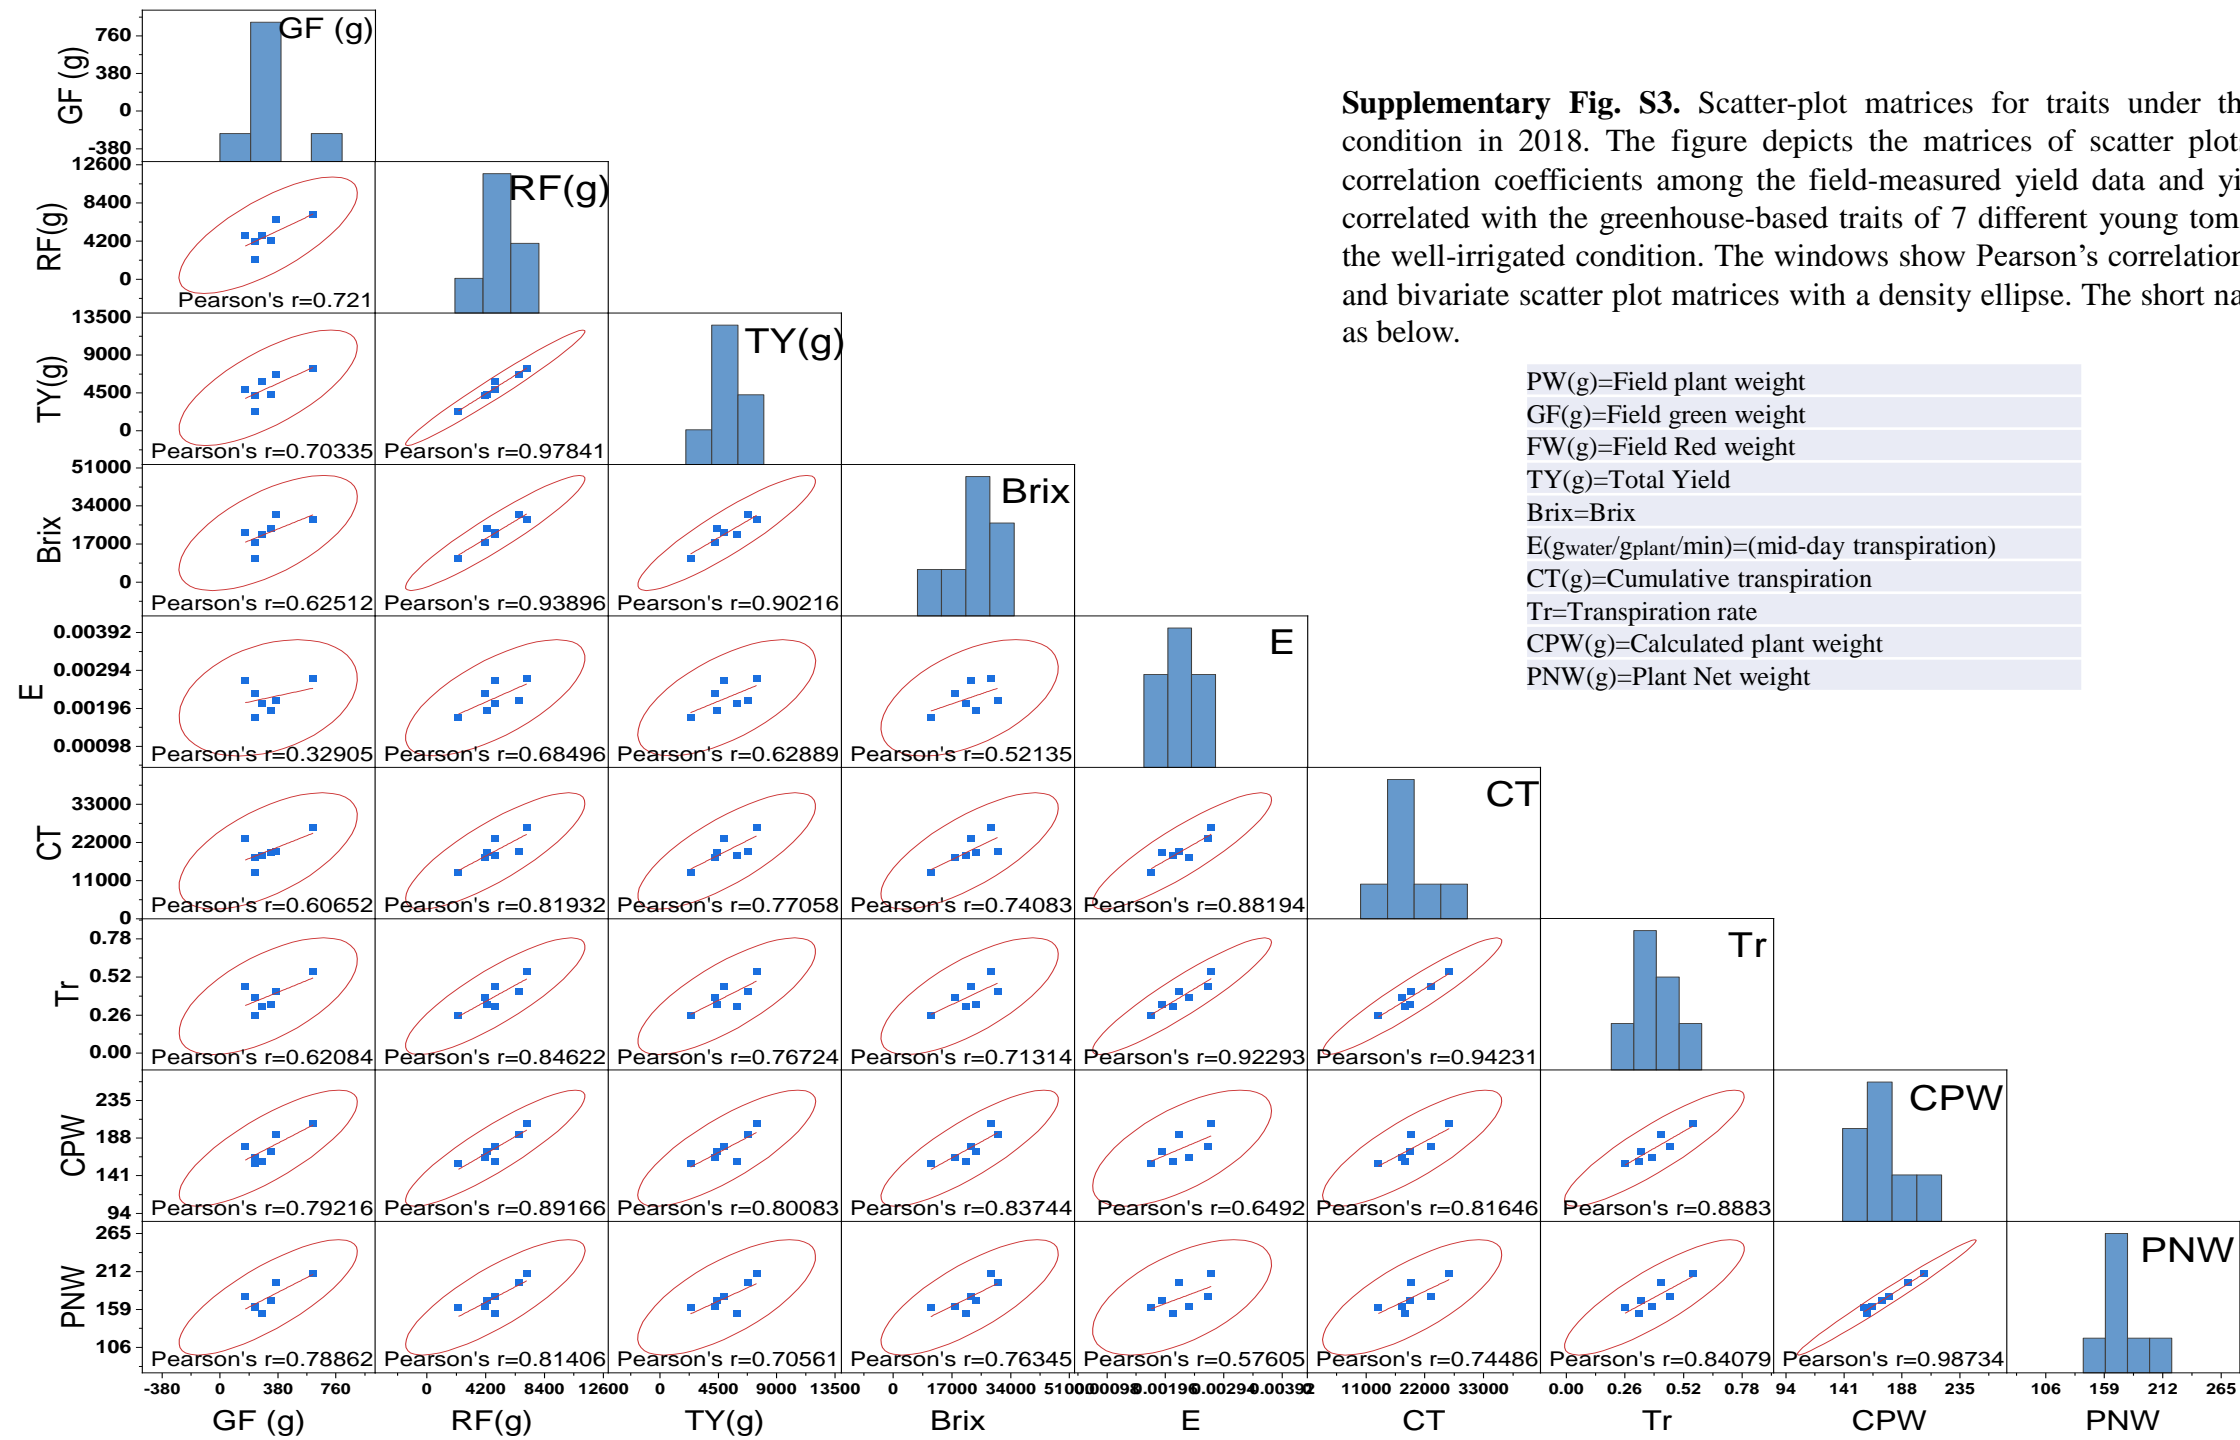

**Supplementary Fig. S3.** Scatter-plot matrices for traits under the well-irrigated condition in 2018. The figure depicts the matrices of scatter plots and Pearson's correlation coefficients among the field-measured yield data and yield components correlated with the greenhouse-based traits of 7 different young tomato plants under the well-irrigated condition. The windows show Pearson's correlation coefficients ( $r$ ) and bivariate scatter plot matrices with a density ellipse. The short names are defined as below.

wet 2018

# Supplementary Figure 3 continued...

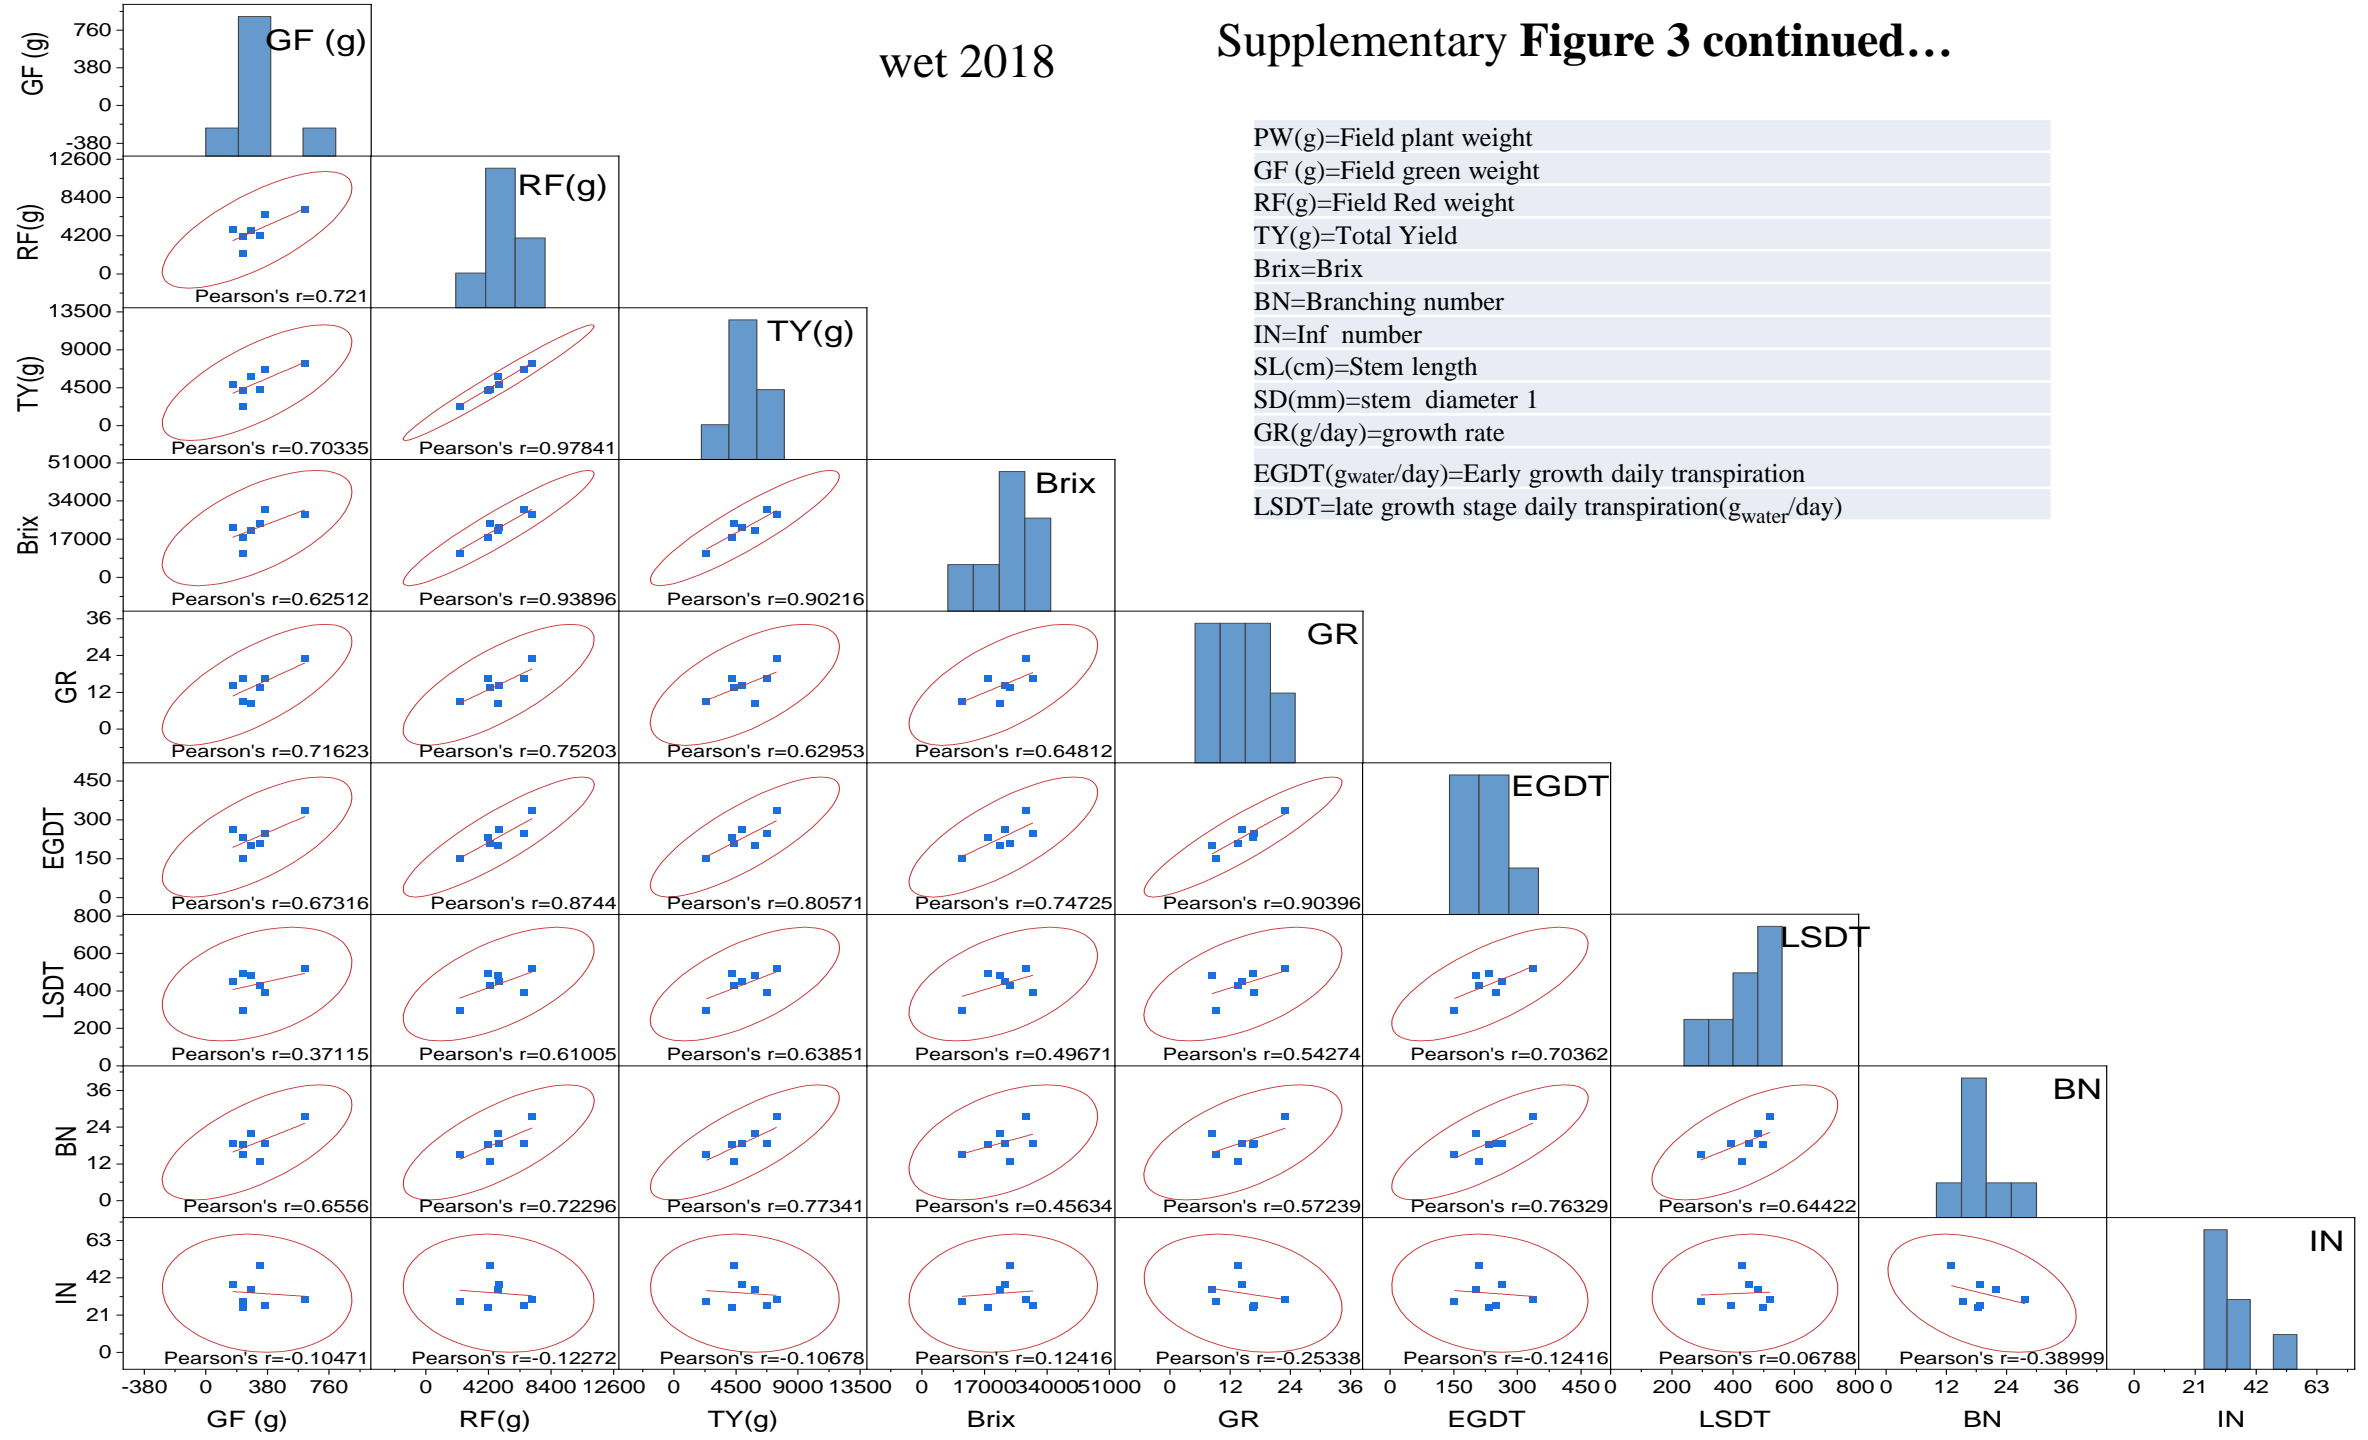

**Supplementary Fig. S4.** Scatter-plot matrices for traits under the water-deficit condition in 2018. The figure depicts the relationships between field-measured yield and yield components, and the greenhouse-based traits of 7 different young tomato plants that were exposed to drought. The windows show Pearson's correlation coefficients ( $r$ ) and bivariate scatter-plot matrices with a density ellipse. The short names are defined as below.

PW(g)=Field plant weight (g)  
 GF(g)=Field green weight (g)  
 RF(g)=Field Red weight (g)  
 TY(g)=Total Yield(g)  
 Brix=Brix  
 E(g<sub>water</sub>/g<sub>plant</sub>/min)=(mid-day transpiration  
 CT(g)=Cumulative transpiration  
 Tr(g/min)=Transpiration rate  
 CPW(g)=Calculated plant weight  
 DT(g<sub>water</sub>/day)=Daily transpiration

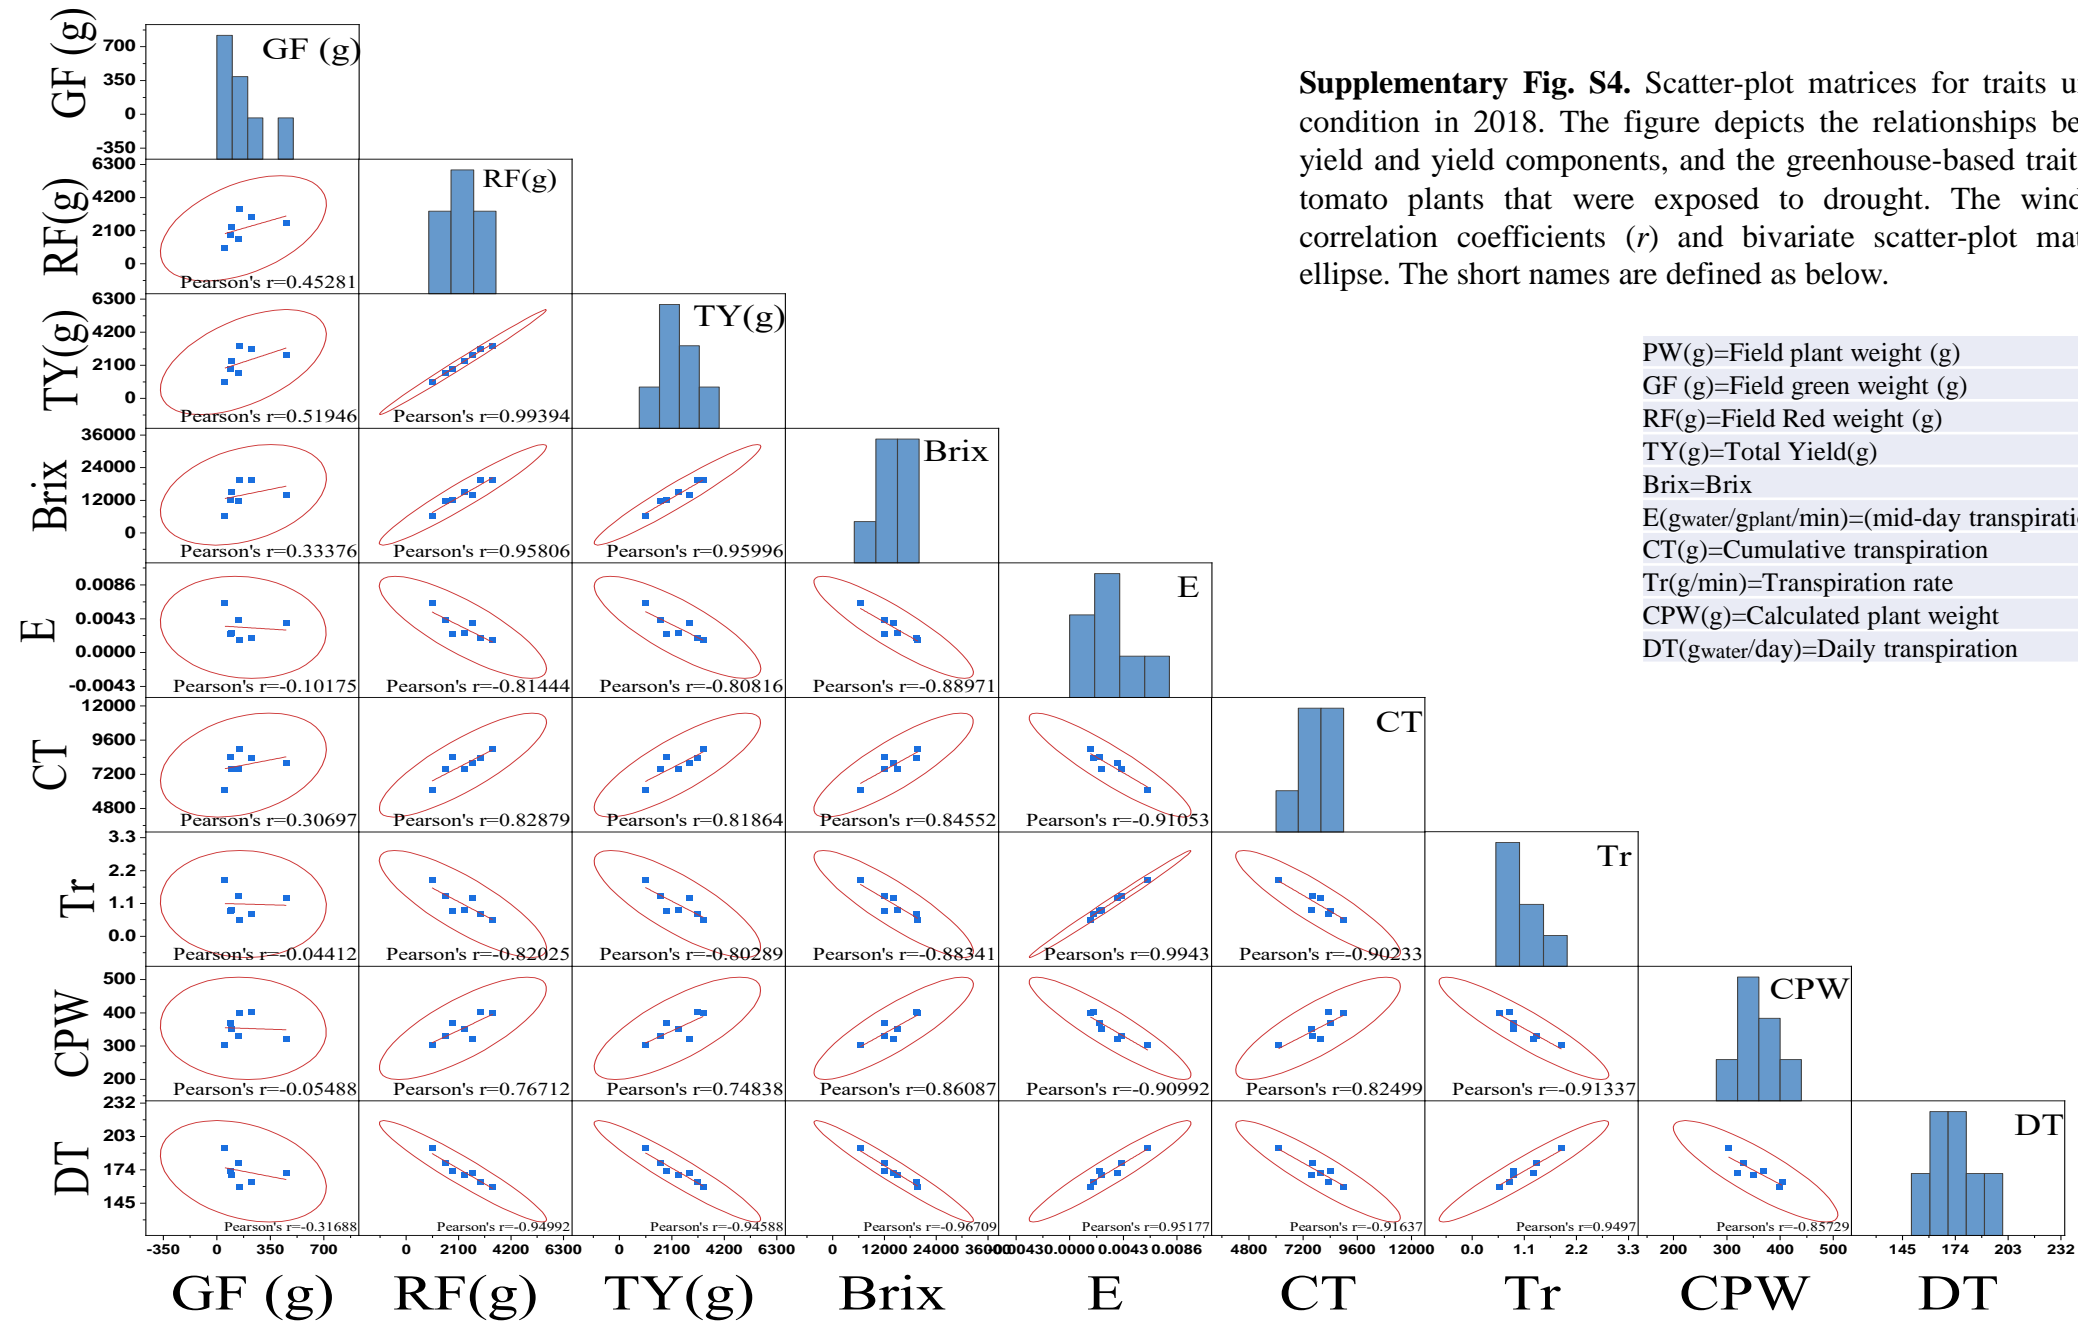

**Fig.S4**

Supplementary Figure 4 continued...

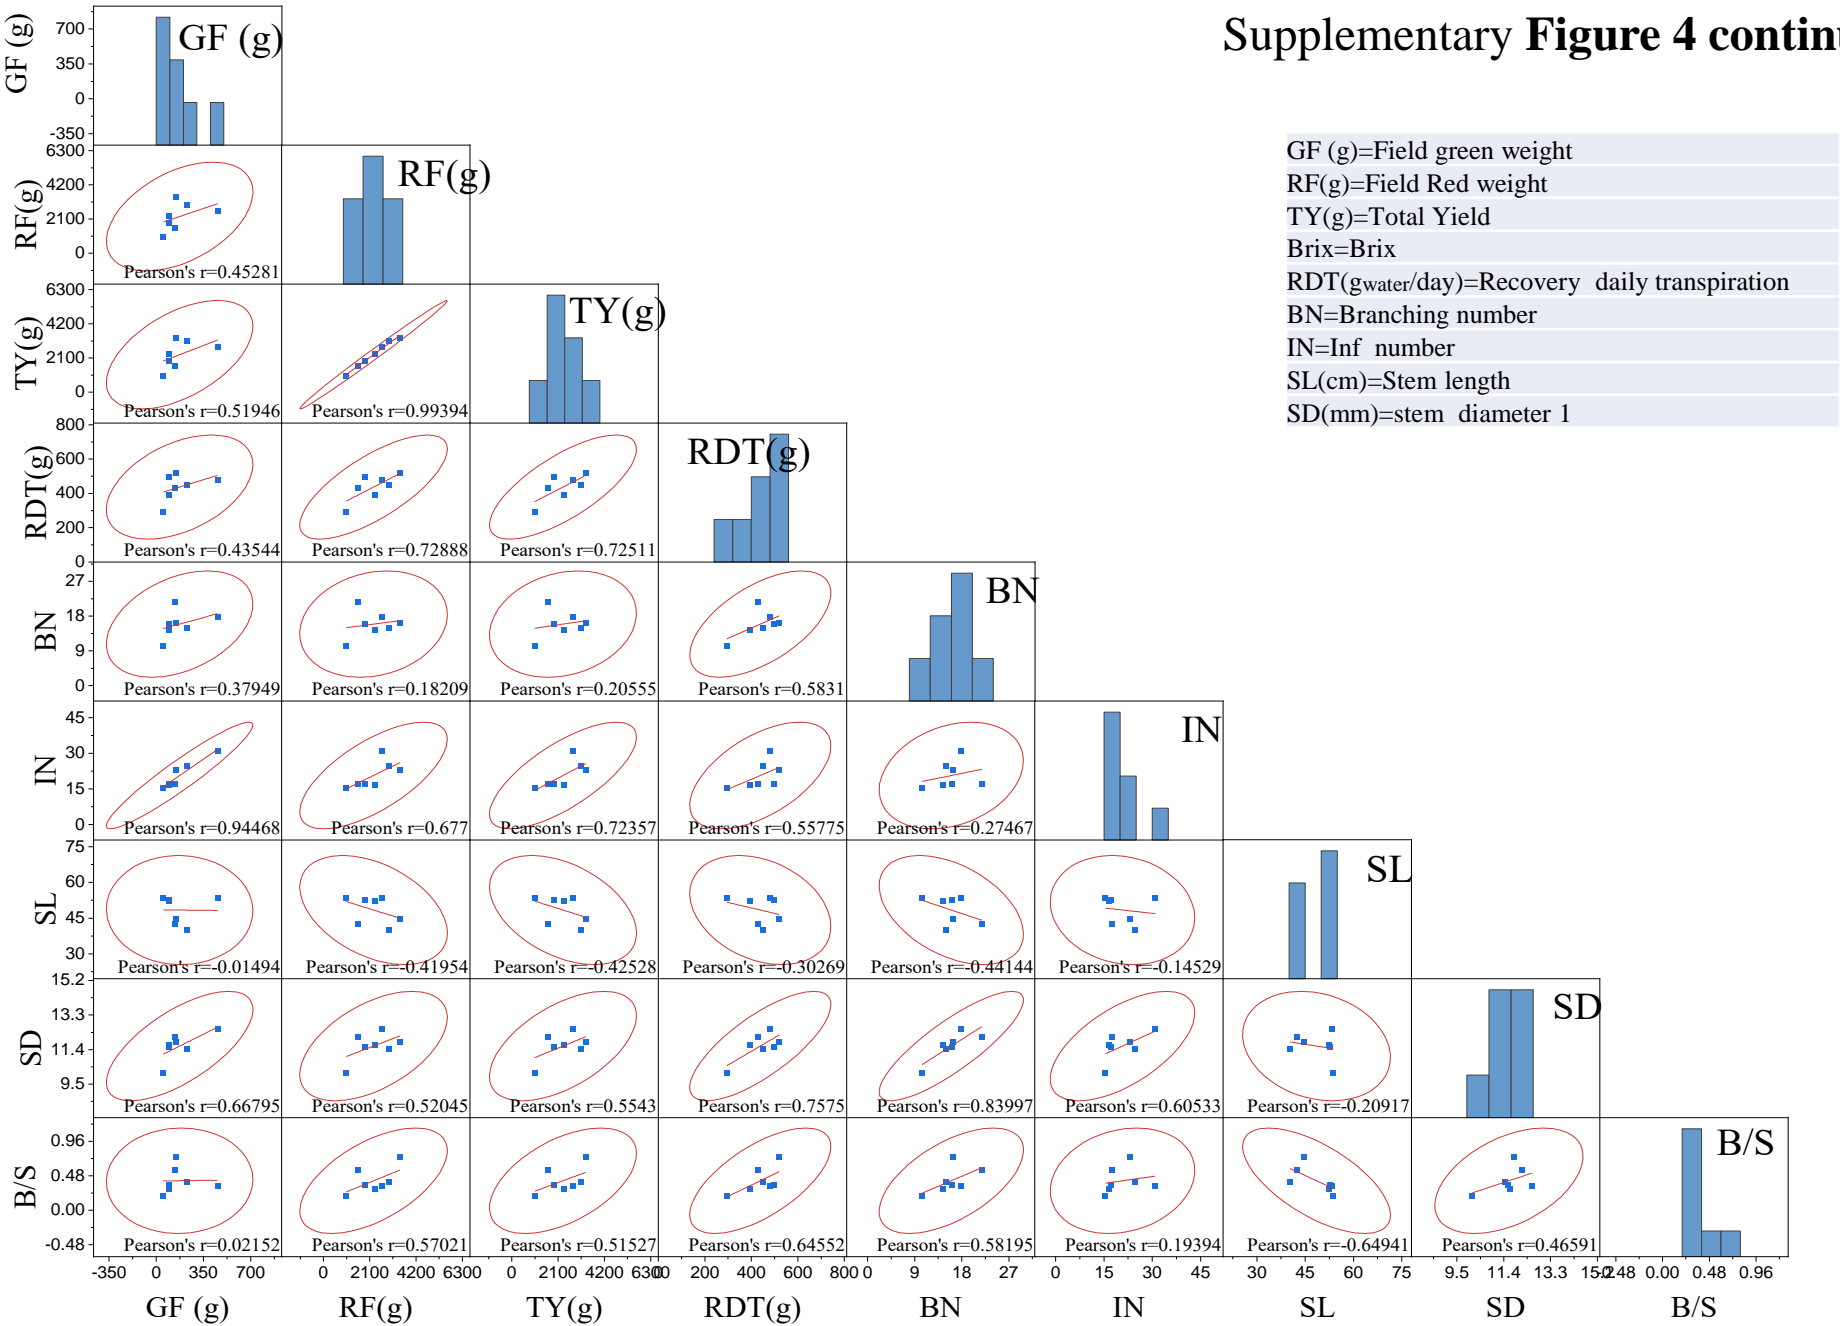



Supplementary Figure 5: Scatter plot matrix for traits under well irrigated conditions in 2019. The relationships between fields measured yield and its components and greenhouse-based traits of 7 different young tomato plants under irrigated condition. The windows are Pearson's correlation coefficients (r) and bivariate scatter plots with density ellipse. The short names are defined as below.

- PW(g)=Field plant weight
- GF (g)=Field green weight
- RF(g)=Field Red weight
- TY(g)=Total Yield
- E(gwater/gplant/min)=E(mid-day transpiration)
- CT=Cumulative transpiration
- Tr(g/min)=Transpiration rate
- CPW(g)=Calculated plant weight
- DT(gwater/day)=Daily transpiration
- RDT(gwater/day)=Recovery daily transpiration
- BN=Branching number
- IN=Inf number

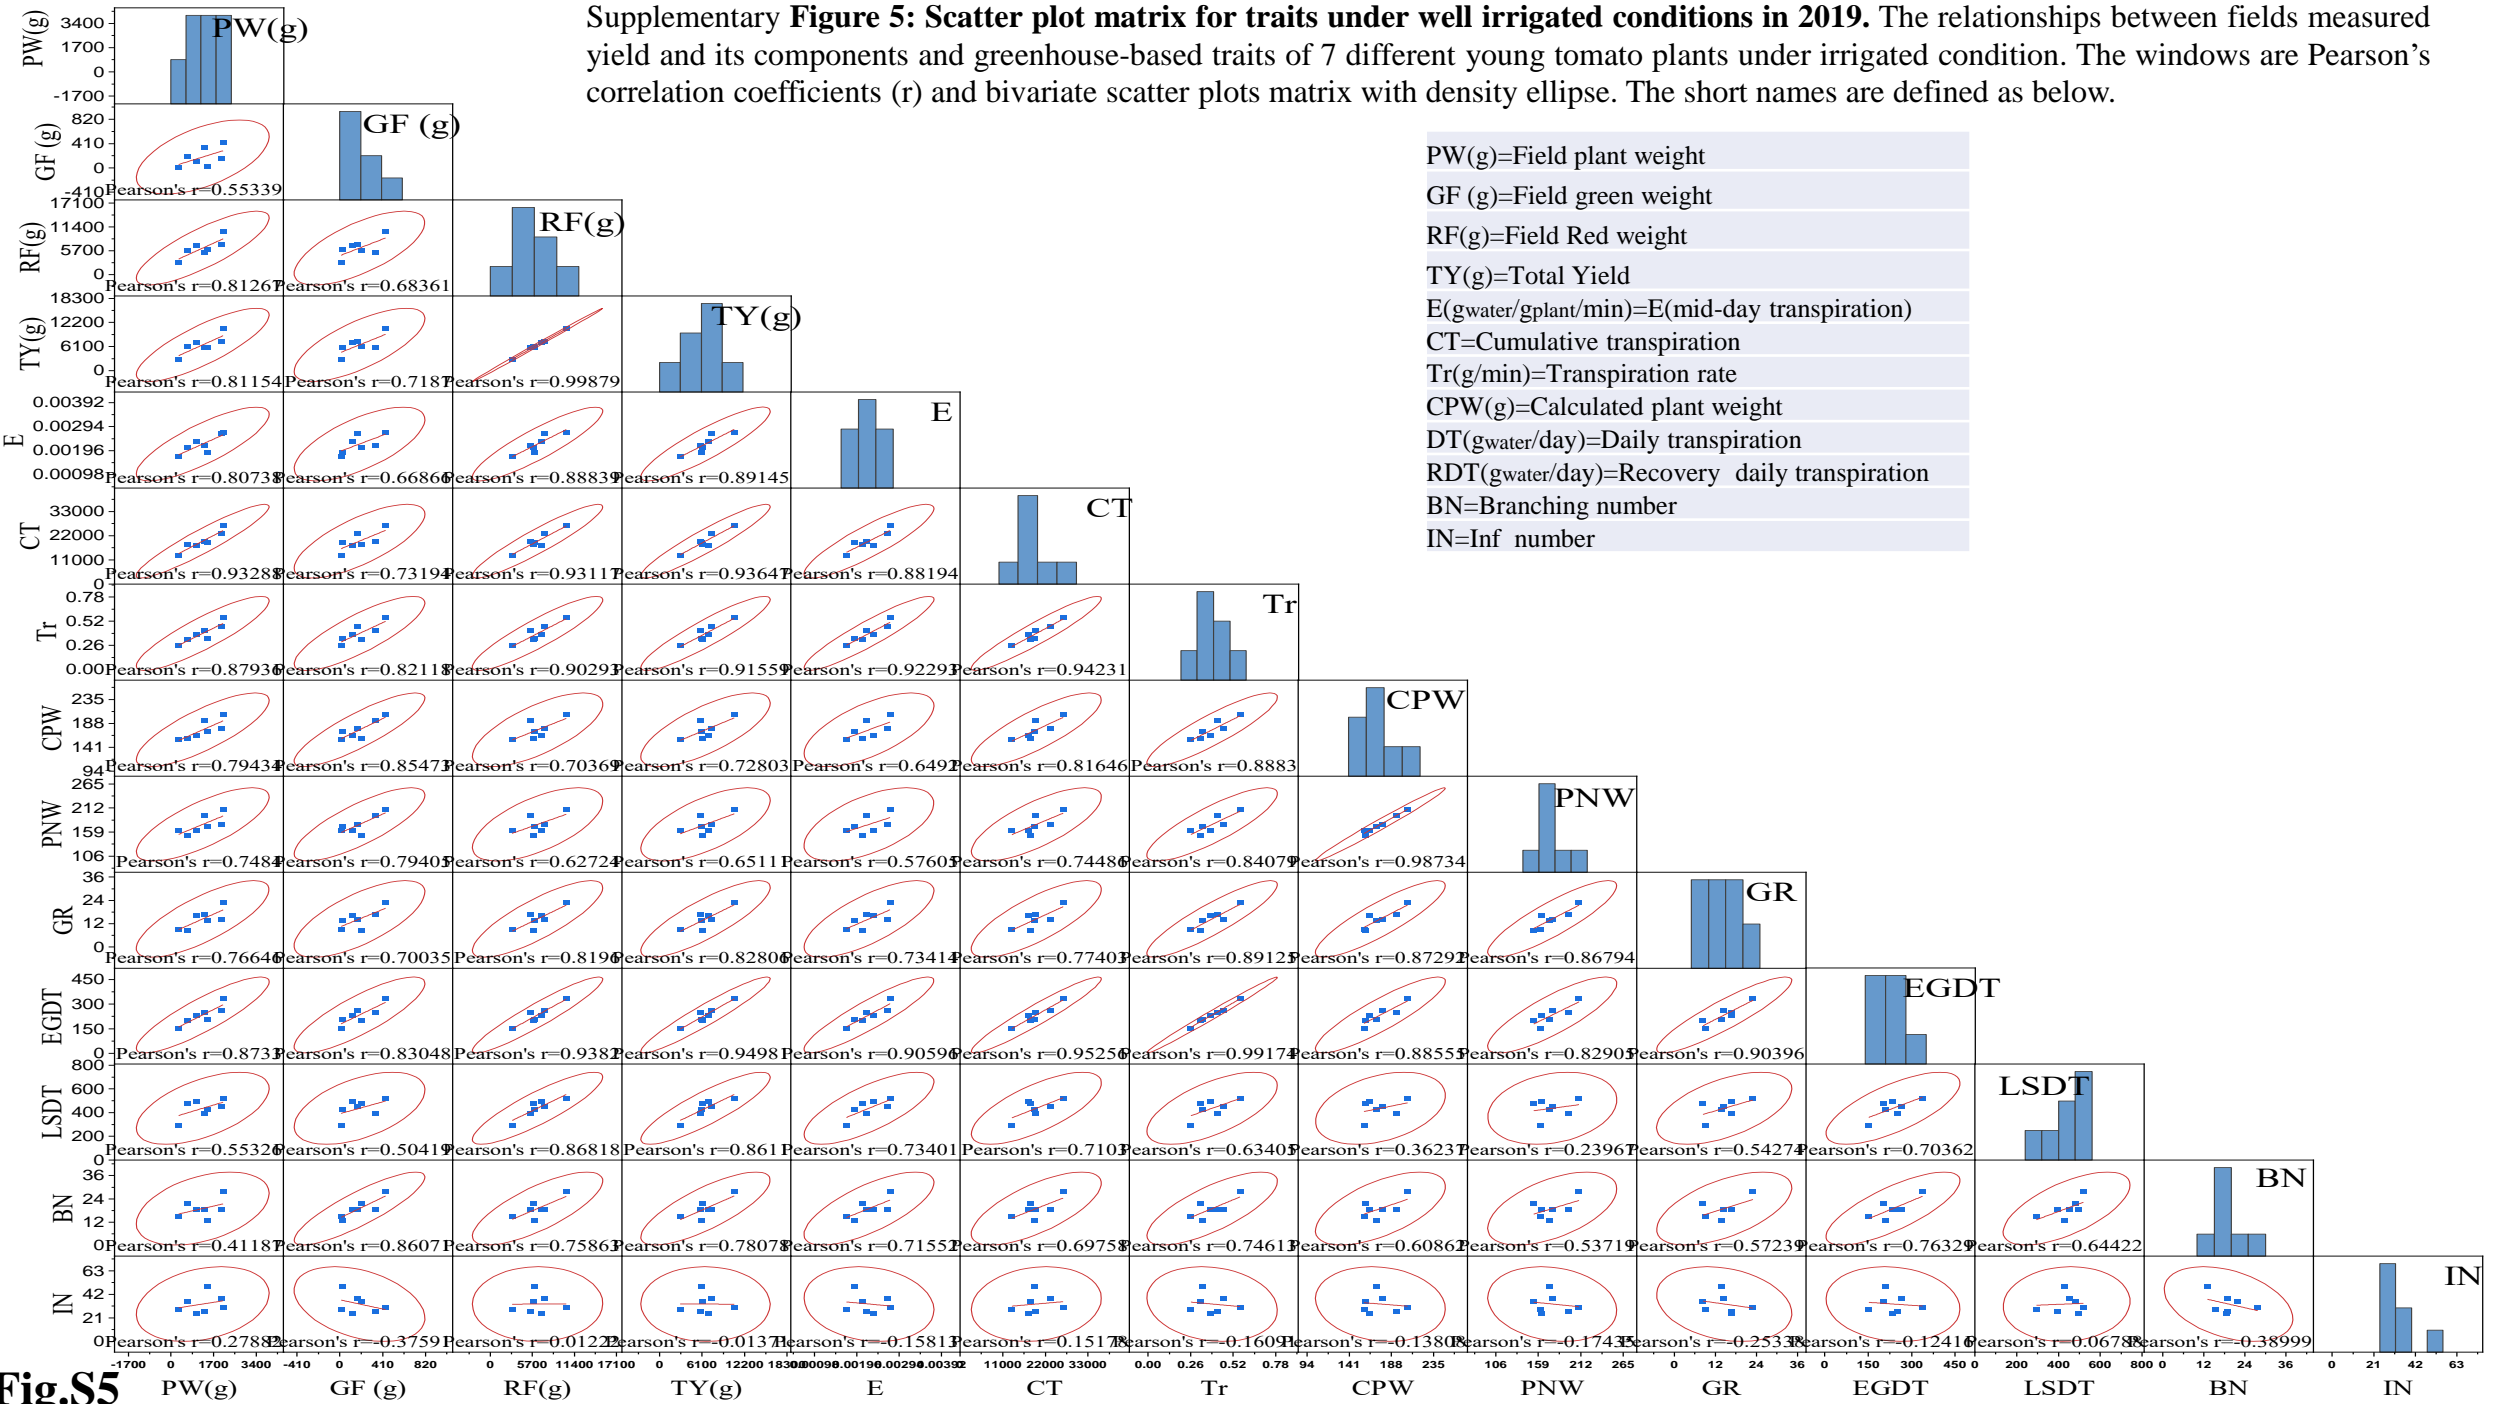

Fig.S5

# Supplementary Figure 5 continued...

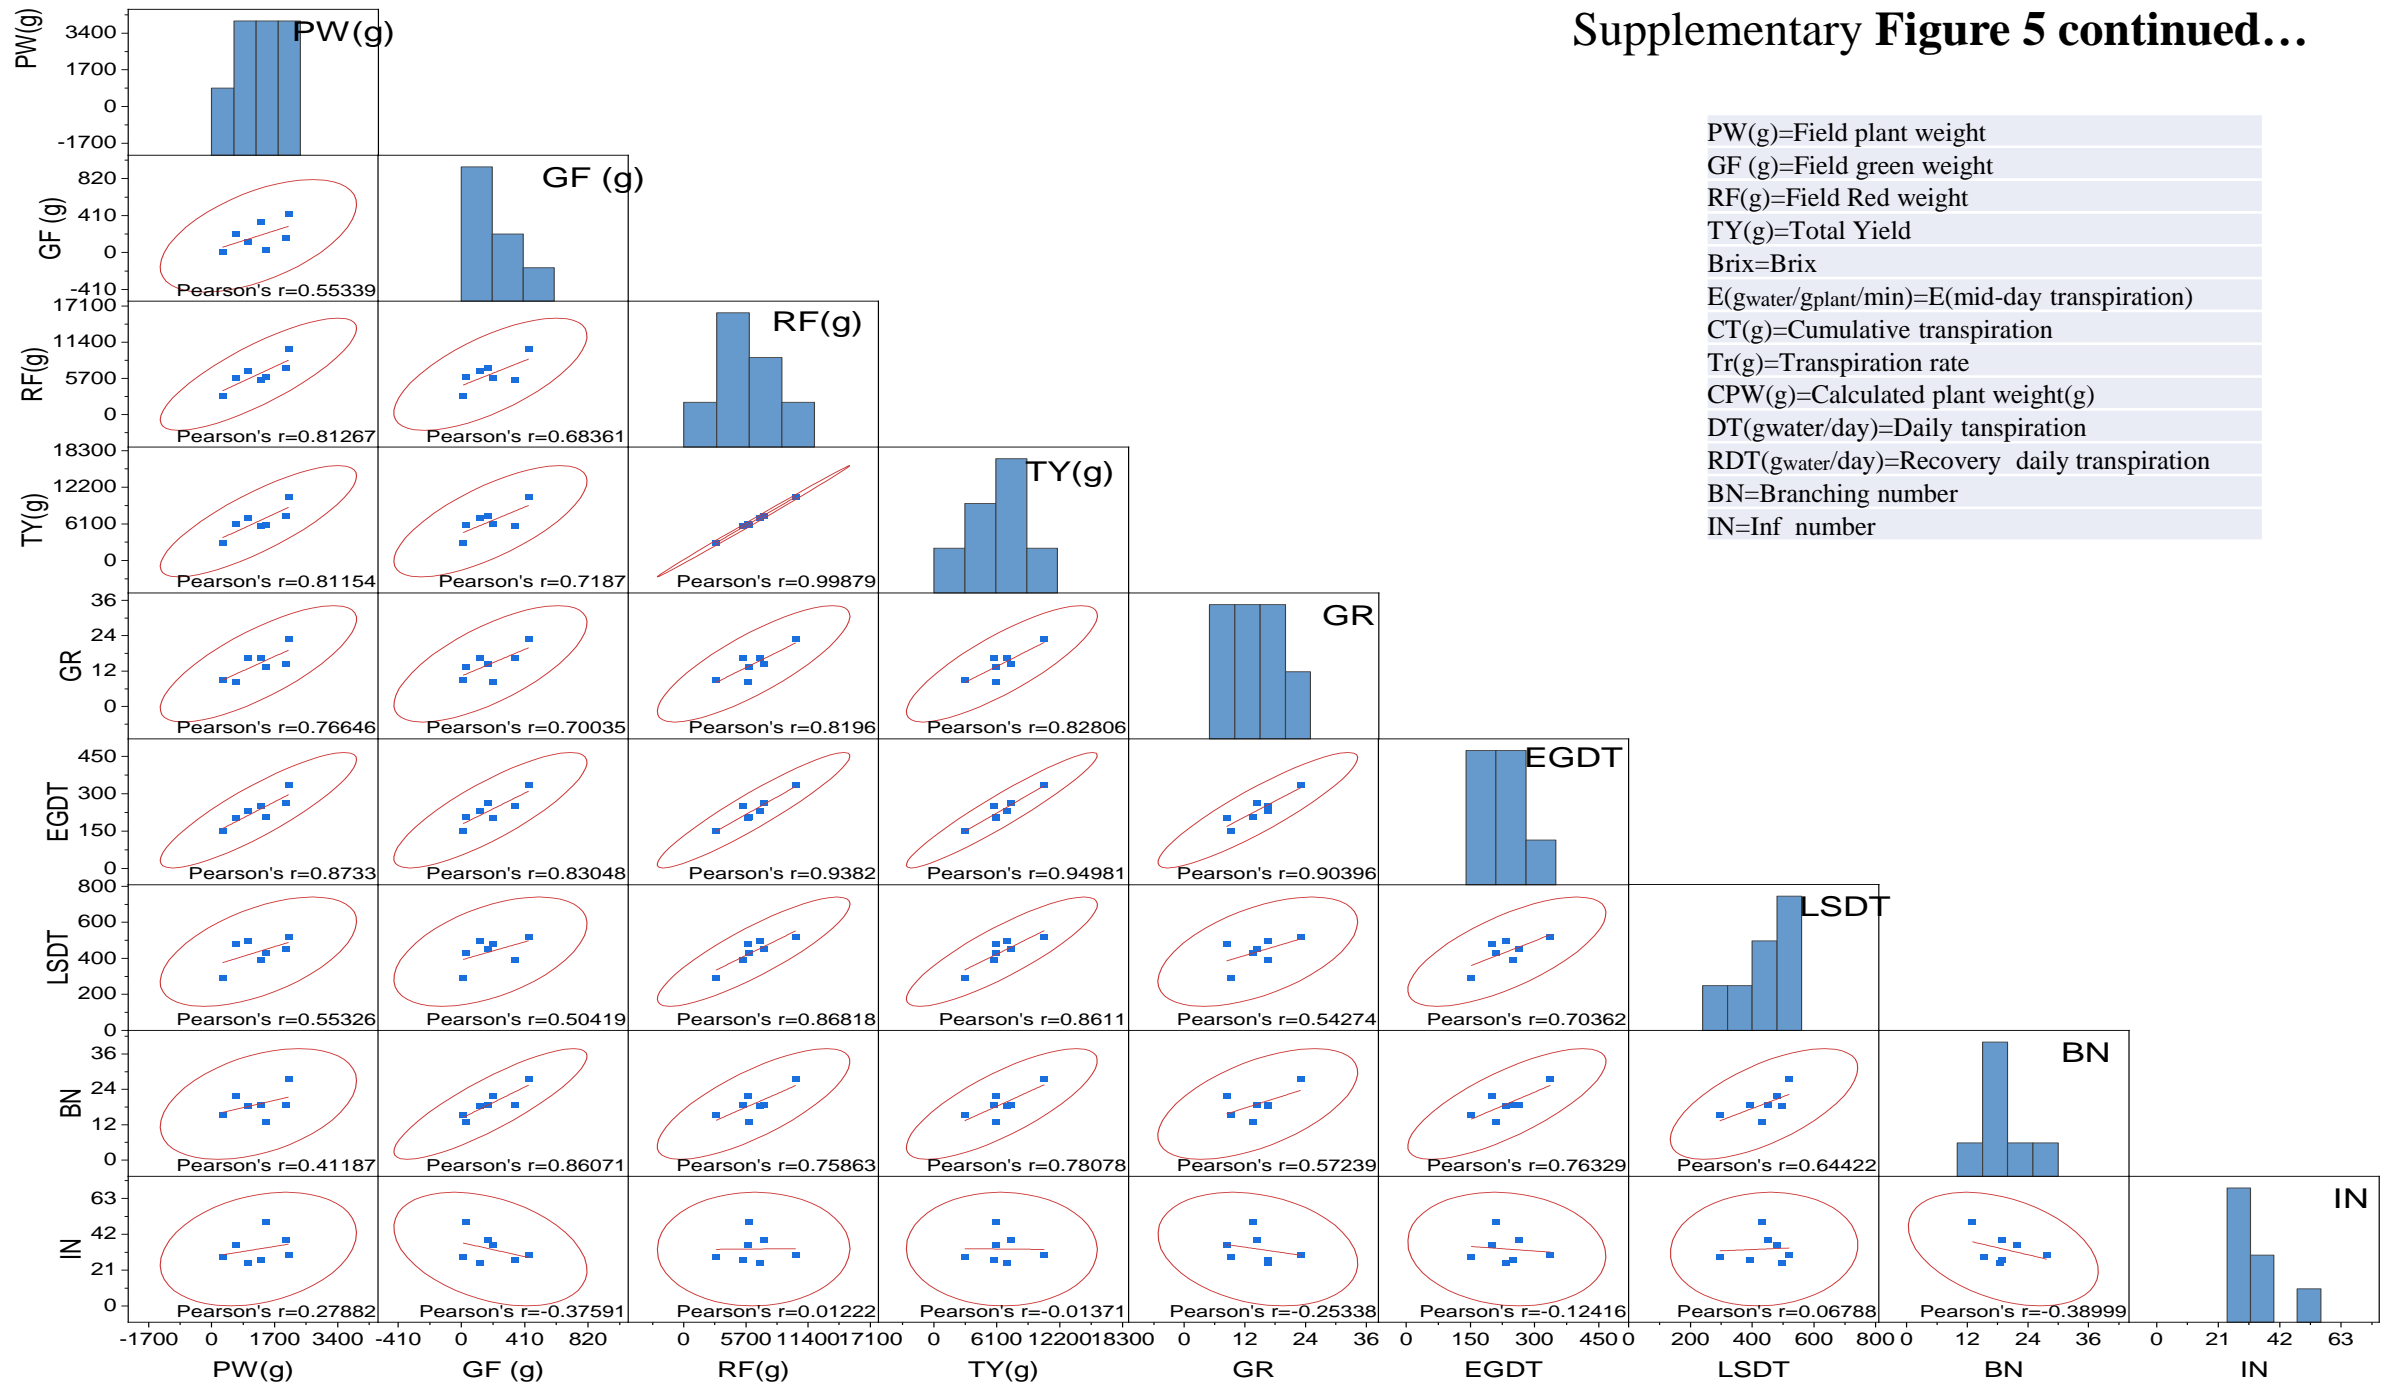

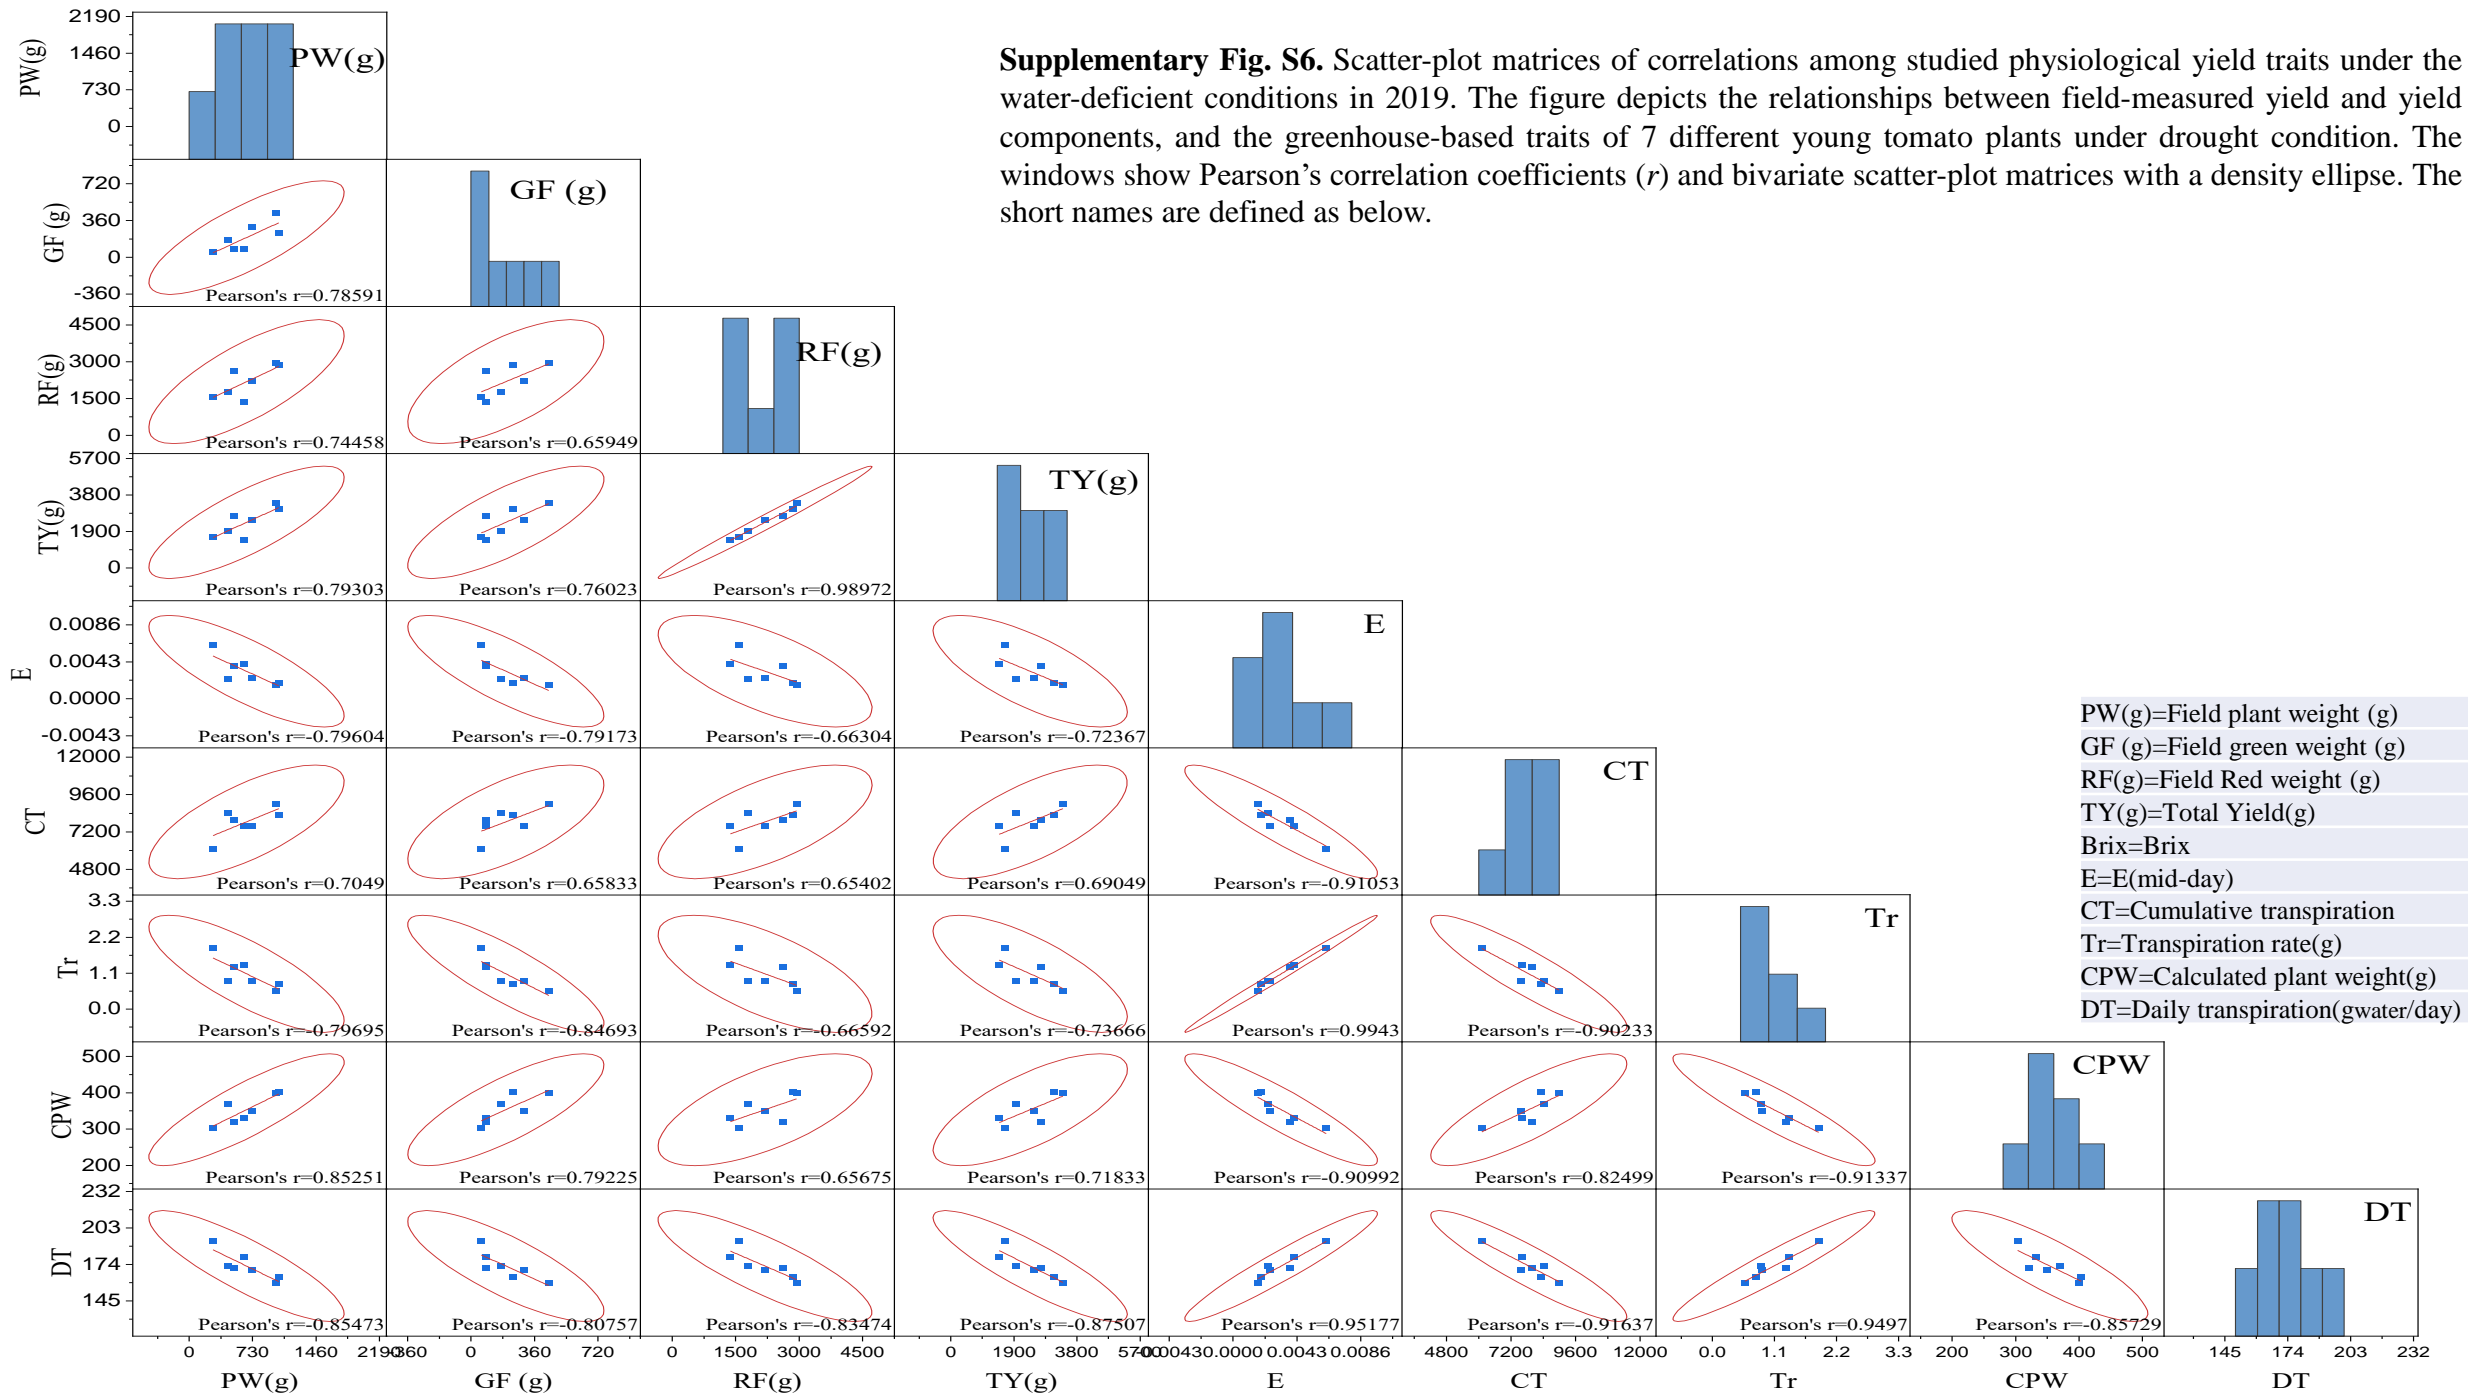

Supplementary Figure 5 continued...

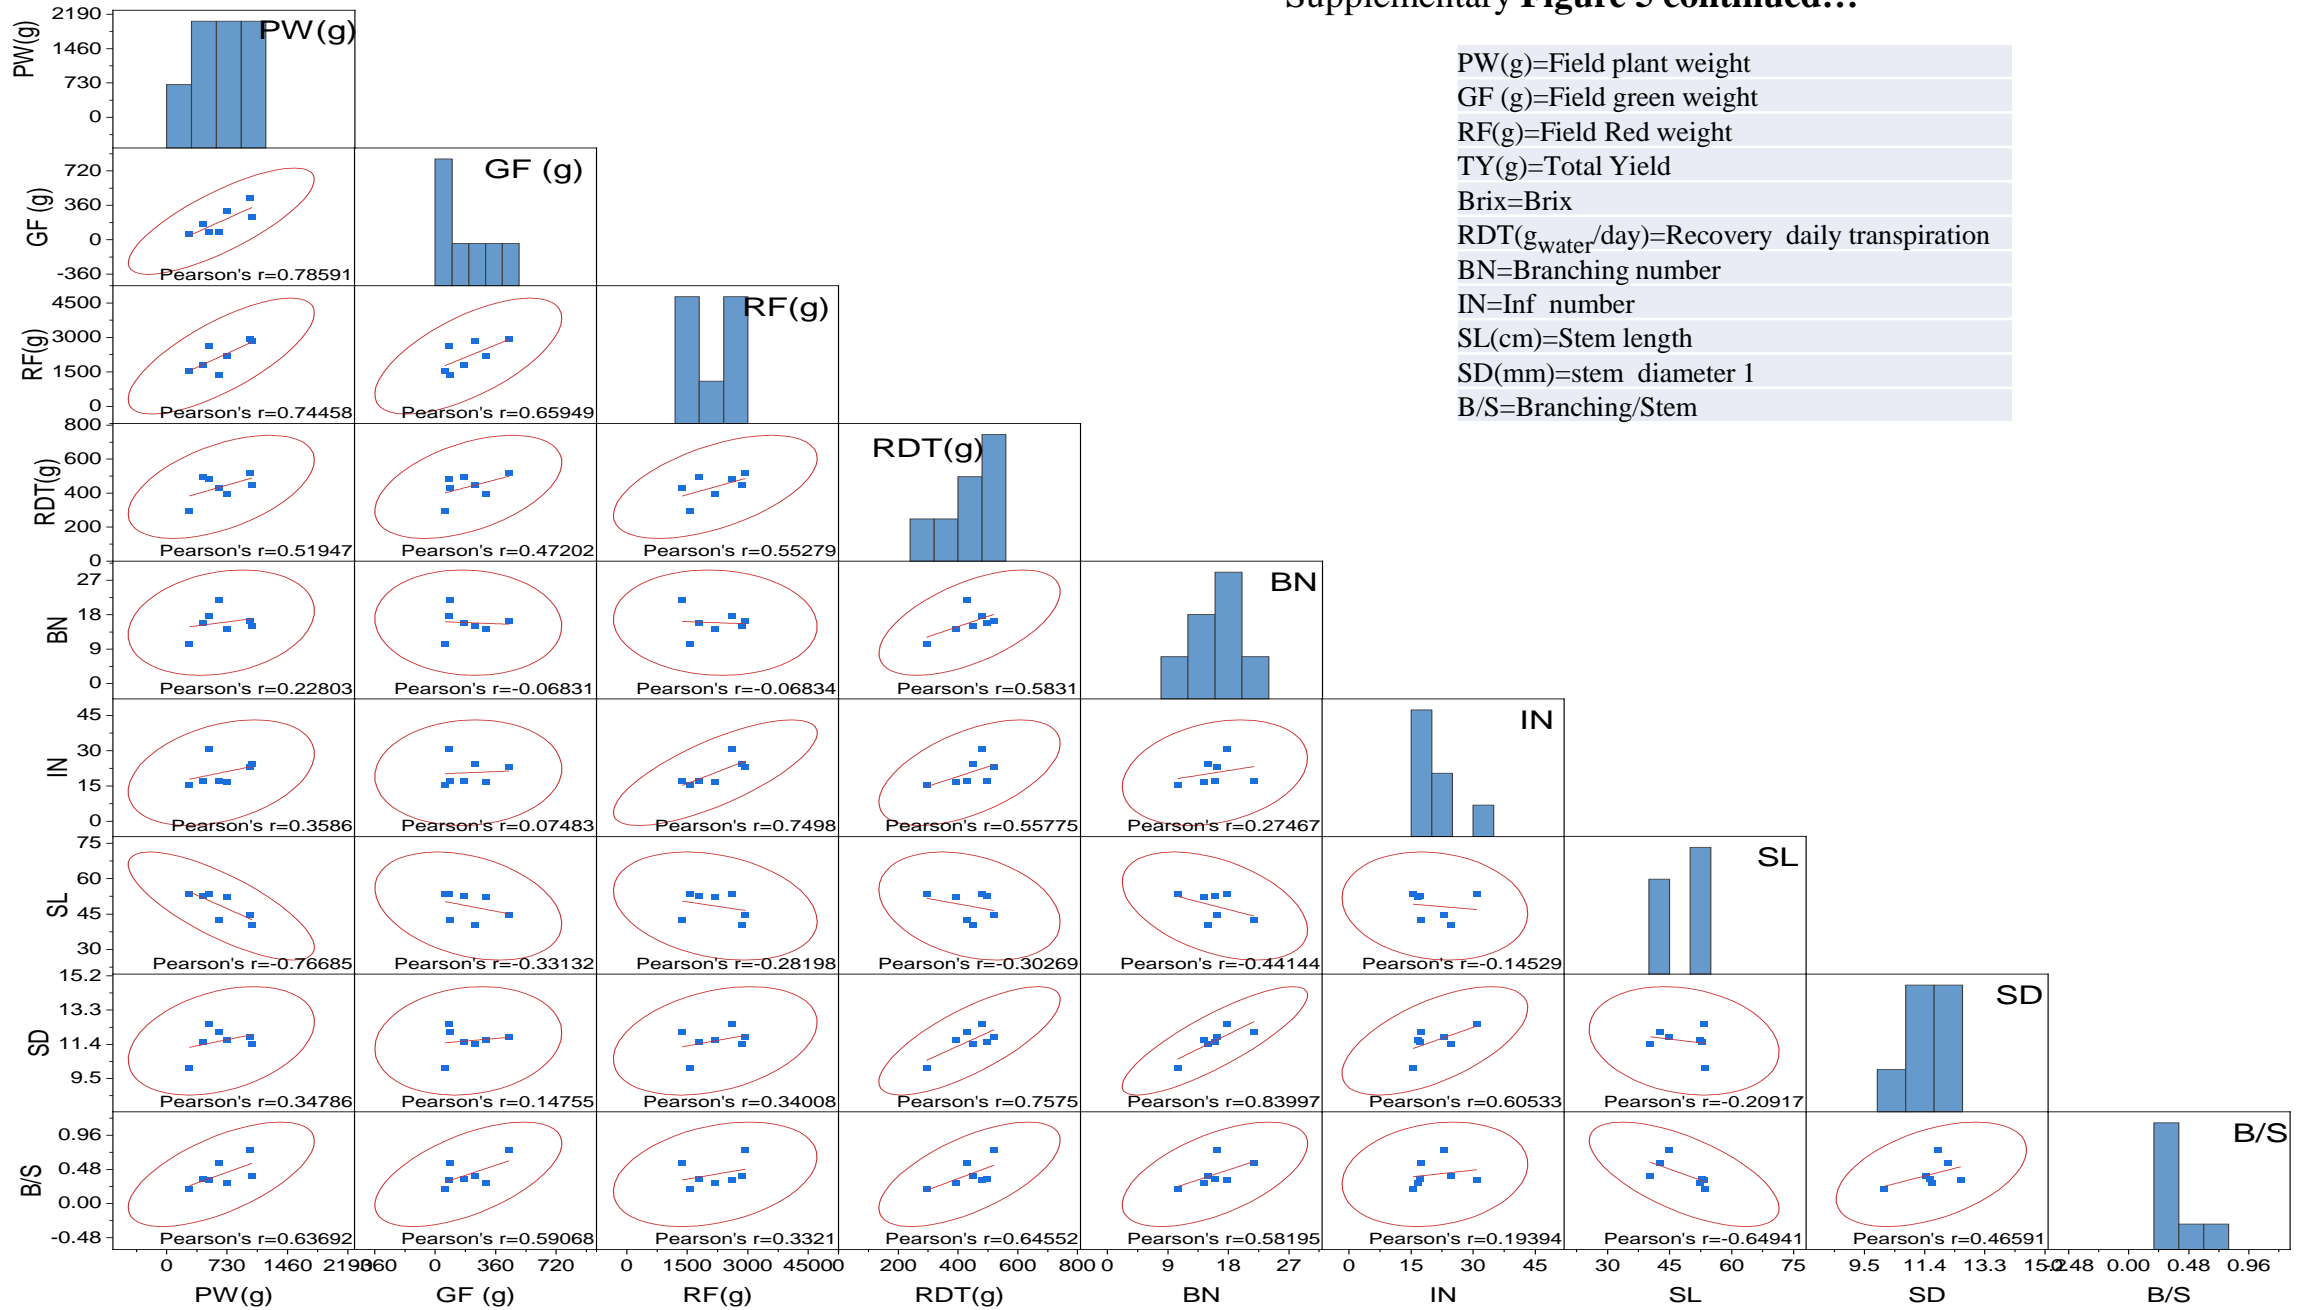

Source: https://www.biorxiv.org/content/10.1101/2021.03.18.435447v2.full.pdf
